# Supplementary material for: Phenotypic Diversity in Wild and Cultivated Date Palm (Phoenix, Arecaceae): Quantitative Analysis Using Information Theory
Source: MDPI journal article supplement (doi:10.3390/horticulturae8040287), 2022-03-29
Supplement: s1 [file s1]

# Phenotypic diversity in wild and cultivated date palm (*Phoenix*, Arecaceae): quantitative analysis using Information Theory

Diego Rivera <sup>1\*</sup>, Francisco Alcaraz <sup>1</sup>, Diego J. Rivera-Obón <sup>2</sup>, and Concepción Obón <sup>3</sup>

## Supplementary Table S1: List of analyzed accessions, herbarium specimens, and included cultivars

Herbarium abbreviations are standard according to Index Herbariorum

Accessions are kept in the National Phoenix Germplasm Collection of Spain in Orihuela (Alicante) (within repository E-160): at EPSO (38° 04' 11" N, 0° 59' 07" W, 26 m) and Palmetum Park (38° 04' 00" N, 0° 58' 00" W, 27 m)

NOTE: accessions lost in the field due to *Rhynchophorus* attack are represented in crossed out characters.

### Species, varieties and Groups

#### *P. abyssinica* Drude

Cultivars: so far unknown.

Herbarium specimens: **ERYTREA**, AMASEN, Hamasien = Hamacen, 15°20'03.84"N 38°56'06.97"E, Nefasit al Maha-Bar, 1570 m alt., 2 February 1909, (♀), H. A. Fiori, 453, (FT!), 1. Hamasien, 1570 m alt., 1570 m alt., 29 March 1909, (♀), (♂), Fiori, 453, (FT!), 1. Monte Bizen, 24 April 1902, H. A. Pappi, 4842, (FT!), 1. Monte Bizen, 24 April 1902, FR, A. Pappi, 4842, (FT!), 1. Monte Bizen, 24 April 1902, (♀), A. Pappi, 4842, (US!), 1. Monte Bizen, 24 April 1902, H. Penne & Matteoda, 4842, (P!), 1. Monte Bizen, 24 April 1902, H. Penne & Matteoda, 4842, (US!), 1. Monte Savur (Saveur), 11 December 1905, H. O. Beccari, s.n., (FI-B!), 1. Treno Nafos & Maha-Bar, enero de 1909, (♀), A. Fiori, s.n., (FI-B!), 1. Valle Faghenat, 1 December 1905, H. O. Beccari, s.n., (FI-B!), 1. ANSEBA, Bagos sul Ainsaba preso Keren, 29 October 1861, FR, SE, H. Steudner, 1540, (FI-B!), 1. DAHLAK ARCHIPELAGO, Isola Dahlak (Dahlak Kebir, Dahalak), 15°50'N-40°12'E, 10 m alt., 12 March 1892, H. A. Terracciano, 751(403), (FT!), 1. Shumma (Isola Sciumma), 15°31'N-40°0'E, 25 m alt., 22 March 1892, H. A. Terracciano, 620, (FT!), 1. DEBUB, Vallée d'Arrôt (Barasio River) 15.16558°N 39.17392°E, 1350 m alt., 1 April 1892, (♀), (♂), G. Schweinfurth & Riva, 740, (FT!), 1. DEBUB, Vallée d'Arrôt (Barasio River) 15.16558°N 39.17392°E, 1350 m alt., 1 April 1892, (♀), G. Schweinfurth & Riva, 740, (US!), 1. MAAKEL, Assaorta, laghetto da Minat, 1500 m alt., 21 March 1893, (♀), H. A. Pappi, 3219, (FT!), 1. MENLA, Torrente Ibessela (Messeb?), 1000 m alt., 29 March 1909, (♂), A. Fiori, 4, (FT!), 1. Torrente Ibessela (Messeb?), 1000 m alt., 29 March 1909, H. A. Fiori, 4, (FT!), 1. Torrente Messeb, 28 March 1909, (♂), A. Fiori, s.n., (FI-B!), 2. MENSA, Loaba (Laba), 1500 m alt., 19 January 1893, H. A. Terracciano & A. Pappi, 1371, (FT!), 1. SEMĒNAWĪ K'EYIH BAHRI, Aidereso, 8 April 1892, (♂), G. Schweinfurth & Riva, 1610, (US!), 1. Aidereso, 8 April 1892, (♀), (♂), G. Schweinfurth & Riva, 1610, (FT!), 1. Aidereso, monte Abombe, 1245 m alt., 8 April 1892, (♀), (♂), G. Schweinfurth & Riva, 740,

(FT!), 1. Ocule Cusai, 1800 m alt., 16 April 1893, (♀), H. A. Pappi, 4207, (FT!), 1. Ocule Cusai, 1800 m alt., 16 April 1893, (♀), A. Pappi, 4207, (FT!), 1. Ocule Cusai, Torrente Aidereso, 1800 m alt., 16 April 1893, (♀), H. A. Pappi, 4220, (FT!), 1. **USA**, FLORIDA, Key Biscaine, 14 February 1965, (♀), (♂), H. R. Read, 1373, (FTG!), 1. Key Biscaine, 14 February 1965, (♂), R. Read, 1373, (FTG!), 1. Key Biscaine, 14 February 1965, (♀), R. Read, 1373, (FTG!), 1. Key Biscaine, 15 May 1970, (♀), W. Gillis, 9251, (FTG!), 1. **ETIOPÍA**, AMHARA, Dembiya (woreda) (Dembia), Cusquam, luoghi umidi umbrosi, 25 September 1909, H. Chiovenda, 2185, (FT!), 2. Dembiya (woreda) (Dembia), Cusquam, luoghi umidi umbrosi, 25 September 1909, (♀), Chiovenda, 2185, (FT!), 1. Kebra Uddus Gabriel, 4 February 1937, (♀), R. Pichi-Sermolli, 1997, (FT!), 1. Lago Tana, ?, H. R. Pichi-Sermolli, 2003, (P!), 2. Lago Tana, foresta sulla sponda orientale del Nilo Azzurro, 10 February 1937, H. R. Pichi-Sermolli, 1998, (FT!), 1. Lago Tana, torrente Gueldo, 18 March 1837, H. R. Pichi-Sermolli, 1999, (FT!), 1. Lago Tana, torrente Gueldo, 18 March 1837, H. R. Pichi-Sermolli, 2000, (FT!), 1. Monte Abba Bailú, Reg. Ciucia Ifag (Yfag), Lake Tana area, 10 March 1937, H. R. Pichi-Sermolli, 2001, (FT!), 1. Near Ifag (Yfag) 12°05'00.0"N 37°43'00.0"E, Lake Tana area (Presso Ifag), 10 March 1937, (♀), H. R. Pichi-Sermolli, 2002, (FT!), 1. Piana Lago Tana, 8 January 1937, (♂), H. ?, 50, (FT!), 1. Presso il Torrente Taquàn, lungo la via fra Quonzelá ed Alefá, 28 February 1937, (♀), R. Pichi-Sermolli, 1904, (FT!), 1. Presso il Torrente Taquàn, lungo la via fra Quonzelá ed Alefá, 28 February 1937, H. R. Pichi-Sermolli, 1993, (FT!), 1. Presso il Torrente Taquàn, lungo la via fra Quonzelá ed Alefá, 28 February 1937, (♀), R. Pichi-Sermolli, 1995, (FT!), 1. Riva del Lago Tana, in corrispondenza di Scimbit (Bahar-Dar, 11°37'N-37°24'E), 1880 m alt., 3 February 1937, H. R. Pichi-Sermolli, 1996, (FT!), 1. Sciuma Apù lungo la riva del Lago Tana a Ouest di Bahar-Darma, 2 February 1937, H. R. Pichi-Sermolli, 2003, (FT!), 1. Sciuma Apù lungo la riva del Lago Tana a Ouest di Bahar-Darma, 2 February 1937, H. R. Pichi-Sermolli, 2003, (P!), 1. **BEGEMDIR PROV.**, Foresta Chiesa Zara Enda Michael, 1950 m alt., 16 March 1937, FR, H. R. Pichi-Sermolli, 1995, (FT!), 1. Quonzela a Ambara Jesus, 11°53'N-37°3'E, 1840 m alt., 26 February 1937, FR, R. Pichi-Sermolli, s.n., (FT!), 2. Quonzela a Ambara Jesus, 11°53'N-37°3'E, 1840 m alt., 26 February 1937, H. R. Pichi-Sermolli, s.n., (FT!), 2. **CENTRAL ETHIOPIA**, Galla Arusi (Arusi Galla), 2000 m alt., 28 June 1909, H. G. Negri, 985, (FT!), 1. Scioa (Xoa, Shoa, Sewa, Shewa), 2650 m alt., 25 May 1909, H. G. Negri, 600, (FT!), 1. Scioa (Xoa, Shoa, Sewa, Shewa), 2650 m alt., 25 May 1909, FR, SE, G. Negri, 600, (FT!), 1. **HARAR**, Bedenno, 9°06'35.0"N 41°37'55.0"E, 1600 m alt., 14 April 1963, (♂), W. Bunger, 2616, (US!), 1. **HORA ELA**, SIDAMO, Chiri (Chire), 2 November 1840, (♂), Dillon & Petit, 531, (P!), 1. Chiri (Chire), 2 November 1840, (♀), (♂), Dillon & Petit, 531, (P!), 3. **KAFFA PROV.**, 7 km E of Jimma, 1750 m alt., 7040'N, 36052'E, 1750 m alt., 26 December 1961, (♀), Meyer, 7819, (K!), 1. Kaffa, E of Jimma, 7°40'N-36°52'E, 1750 m alt., 26 December 1961, (♀), F. Meyer, 7819, (US!), 2. Kaffa, E of Jimma, 7°40'N-36°52'E, 1750 m alt., 26 December 1961, FR, F. Meyer, 7819, (US!), 2. Kaffa, E of Jimma, 7°40'N-36°52'E, 1750 m alt., 26 December 1961, H. F. Meyer, 7819, (US!), 1. **TIGRAY**, Adwa (Adua, Adoa), 2000 m alt., 1 November 1862, (♀), G. Schimper, 794, (US!), 1. Adwa (Adua, Adoa), 2000 m alt., 1 November 1862, (♀), G. Schimper, 794, (P!), 1. Adwa (Adua, Adoa), diciembre de 1861, FR, SE, H. Steudner, s.n., (FI-B!), 1. Adwa (Adua, Adoa) corsi d'acqua, 2500 m alt., 7 June 1909, (♀), FR, H. Chiovenda, 381, (FT!), 1. Adwa (Adua, Adoa) corsi d'acqua, 2500 m alt., 7 June 1909, (♂), H. Chiovenda, 381bis, (FT!), 1. Adwa (Adua, Adoa) Nombre local: Silen o Sieh, 14 November 1862, FR, SE, G. Schimper, 794, (FI-B!), 1. Enda Mariane Sciaita, Addi Abun a l'hora y media de Adwa (Adua, Adoa), 15 July 1914, FR, SE, J. Baldrat, s.n., (FI-B!), 1. Presso Atocha (N Tigray), noviembre de 1861, FR, SE, H. Steudner, 1541, (FI-B!), 1. **UNCERTAIN**, ETIOPÍA, Abyssinia, Herb. P. 1878413, ?, (♀), (♂), ?, (P!), 1. **SUDAN**, DJUR (DARFUR), Genena, 13 April 1869, H. G. Schweinfurth, 1358, (P!), 1. Genena, 13 April 1869, H. G. Schweinfurth, 1358, (P!), 1.

## *P. acaulis* Roxb.

**Cultivars:** Janggali Khajur, Khajuri, Short seeded, Dark Red, Long seeded.

**Accessions E-160:** 50(V) (EPSO AL06), 66(V) (EPSO AH07), 180-181(V), 351(S), 403(S), 477(S), 661(SV) (EPSO AL03), 662(SV) (EPSO AL02), 663(SV) (EPSO AL04), 724(SV) (Palmetum 6, N 126), 725(SV) (Palmetum 9, N 112), 726(S), 1418(SV) (Palmetum 9, N 123), 1482(S), 1487(S).

**Herbarium specimens:** **INDIA**, ASSAM, Khasia Hills, 1 January 1886, (♀), (♂), Mann, s.n. , (FI-B!), 1. Khasia Hills, 1 January 1886, (♀), (♂), Mann, s.n. , (K!), 1. UNCERTAIN, Keyrah Pah?, ?, (♀), FR, V. Jacquemont, 372, (P!), 1. Keyrah Pah?, ?, H, V. Jacquemont, 372, (P!), 1. Soave Adribar? (Ad rivas Soave), ?, (♂), H, J. Hooker & T. Thomson, s.n., (P!), 2. SIKKIM, Sikkim & Teral, ?, (♂), S. Kurz, s.n., (US!), 1. UTTAR PRADESH, between Saharanpur and Najjiabad in Bijnor, 10 March 1887, (♀), Duthie, s.n., (DD!), 1. between Saharanpur and Najjiabad in Bijnor, 10 March 1887, (♀), Duthie, s.n., (K!), 1. Chamoli Distr. Nigol Valley, 1500 m alt., 17 febrero 1979 , 1500 m alt., 17 February 1979, (♀), Naithani, 63743, (BSD!), 1. Corbett National Park, Dubriya Chaur, 25 abril 1971 , 25 April 1971, (♀), Pant, 43751, (BSD!), 1. Mailani, between Lakimpur and Kheri, 20 abril 1964 , 20 April 1964, (♀), Malhotra, 31498, (BSD!), 1. Rishikhund, 3 April 1811, (♀), (♂), Buchanan-Hamilton, 2199, (E!), 1. UTTARAKHAND, Mussoorie, NW Himalaya, 2000 m alt., 18 August 1938, H, R. Stewart, 16891, (US!), 1. Mussoorie, NW Himalaya, Sudour, n slope, 1800 m alt., 20 August 1934, H, R. Stewart, 14487, (US!), 1. **LAOS**, ATSAPHANGTHONG, SAVANNAKHET, Ban Nakapông, 16° 51' 0" N-105° 27' 0"E, 16 November 1998, FR, H, J. Munzinger, 123, (P!), 1. UNCERTAIN, ?, 19 February 1956, (♀), M. Tixier, 7, (P!), 1. ?, 24 April 1955, (♀), H, M. Tixier, s.n., (P!), 1. Ban Na, 19 November 1920, (♀), H, E. Poilane, 2348, (P!), 1. Boukhane, 8 November 1965, H, S. Vidal, 4345, (P!), 1. Di An, 21 August 1940, H, E. Poilane, 30207, (P!), 1. Laos, antes del 30 April 1895, (♂), H, M. Massie, s.n., (P!), 1. SAVANNAKHET, Savannakhet to Quang Tri, km. 120, 9 January 1925, FR, H, E. Poilane, 11580, (P!), 1. VIENTIANE, Ban Mai, common, is situated in Vangvieng, Vientiane, Laos, its geographical coordinates are 18° 51' 57" North, 102° 29', 19 October 1938, FR, H, E. Poilane, 28156, (P!), 1. XIANGKHOANG PROVINCE, Muang Soui, Coordinates: 19°31'15"N 102°53'10"E, 1100 m alt., 7 February 1932, FR, H, E. Poilane, 20028, (P!), 1. **NEPAL**, CHITWAN NATIONAL PARK, South Meghauli, 200 m alt., 7 March 1996, (♀), Watson, 9615, (E!), 1. KABHREPALANCHOK DISTRICT, Kharel, 25 May 1847, H, J. Hooker, s.n., (P!), 1. Kharel, 25 May 1847, (♀), H, J. Hooker & T. Thomson, s.n., (P!), 1. Kharel, 25 May 1847, H, J. Hooker & T. Thomson, 830, (P!), 1. KAMALI VALLEY, Kamali Valley, between Badalhot and Sika, 1350 m alt., 24 April 1952, (♀), Polunin et al. , 3967, (BM!), 1. Kamali Valley, between Badalhot and Sika, 1350 m alt., 24 April 1952, (♀), Polunin et al. , 3967, (E!), 1. SETI, Kailali district, 20 miles NE of Dhangarhi,, 200 m alt., 6 December 1966, (♀), H, D. Nicholson, 2843, (US!), 1.

## *P. andamanensis* W.Mill., J.G.Sm. & N.Taylor

**Cultivars:** aparentemente algunas Seed se introdujeron en Europa por Martin Gibbons en torno a los 1990s (T. Font, pers. com.). So far unknown.

**Accessions E-160:** 150 (Seed, Vegetative, Floral) (EPSO D13), 685(VF) (EPSO AC06), 686(VF) (EPSO AC05), 1100(V) (Palmetum 9, N 128), 1101(V) (Palmetum 9, N 125), 1523-1524(V).

**Herbarium specimens:** **INDIA**, CINQUE ISLAND, Cinque and Rutland Is., 20 July 1911, SE, Rogers, s.n., (K!), 1. CINQUE ISLAND, precise locality unknown, 7 April 1911, (♀), (♂), Rogers, s.n., (CAL!), 1. LITTLE ANDAMAN, Bumila Creek, enero de 1903, (♀), Rogers, s.n., (K!), 1. NORTH ANDAMAN, Saddle Hill, 450 m alt., 28 September 1905, (♀), (♂), Osmaston, s.n., (CAL!), 1. NORTH ANDAMAN, Saddle Hill, 500 m alt., 1 December 1976, (♀), Balakrishnan & Nair, 4771, (CAL!), 1. NORTH ANDAMAN, Saddle Peak, 700 m alt., 14

December 1990, FR, SE, H, J. Ellis, 14189, (K!), 1. RUTLAND IS, Headland, North Dyer Point, 19 May 1904, (♀), H, Rogers, 285, (FI-B!), 1. RUTLAND IS, Headland, North Dyer Point, 19 May 1904, (♀), Rogers, 285, (K!), 1. RUTLAND IS, Headland, North Dyer Point, 60 m alt., 19 May 1904, FR, H, Rogers, 285, (P!), 1. RUTLAND IS, precise locality unknown, 13 February 1904, (♀), H, Rogers, 132, (FI-B!), 1. RUTLAND IS, precise locality unknown, 13 February 1904, (♀), Rogers, 132, (K!), 1.

#### *P. arabica* Burret

Cultivars: so far unknown.

Accessions E-160: 310(Vegetative), 312-314(Seed), 367(V), 368(S), 634(S Floral).

Herbarium specimens: **OMAN**, DHOFAR, Fra Thumrait e Mudday, 17°38'N-53°33'E, 499 m alt., 25 February 2009, H, Rafaelli & Tardelli, 532, (FT!), 6. Pista per Tawi Attayr, 17°03'20"N-54°36'54"E, 330 m alt., 2 October 2001, H, Rafaelli, Tardelli & Mosti, 1136, (FT!), 1. Strada Al Mughsayl - Ajdarawat, 16°52'N-53°42'95"E, 112 m alt., 2 October 2001, H, Rafaelli, Tardelli & Mosti, 532, (FT!), 1. Wadi Al Mughsayl, 16°52'N-53°42'95"E, 112 m alt., 27 April 2001, H, Rafaelli, Tardelli & Mosti, 532, (FT!), 1. **SAUDI ARABIA**, ASIR, Wadi Hibran (Wadi Sha'ib Hibra, Sha'ib Hibrah, Sha'ib Hibra, Sha'ib Hibrah), 17° 44' 47" N - 43° 8' 53" E, year 1855, FR, H, W. Schimper, 250, (FI-W!), 1. Wadi Hibran (Wadi Sha'ib Hibra, Sha'ib Hibrah, Sha'ib Hibra, Sha'ib Hibrah), 17° 44' 47" N - 43° 8' 53" E, year 1855, FR, H, W. Schimper, 250, (E!), 1. Wadi Hibran (Wadi Sha'ib Hibra, Sha'ib Hibrah, Sha'ib Hibra, Sha'ib Hibrah), 17° 44' 47" N - 43° 8' 53" E, year 1855, FR, H, W. Schimper, 250, (E!), 1. Wadi Hibran (Wadi Sha'ib Hibra, Sha'ib Hibrah, Sha'ib Hibra, Sha'ib Hibrah), 17° 44' 47" N - 43° 8' 53" E, year 1855, FR, W. Schimper, 250, (P!), 1. Wadi Hibran (Wadi Sha'ib Hibra, Sha'ib Hibrah, Sha'ib Hibra, Sha'ib Hibrah), 17° 44' 47" N - 43° 8' 53" E, year 1855, FR, SE, H, W. Schimper, 250, (P!), 2. Wadi Hibran (Wadi Sha'ib Hibra, Sha'ib Hibrah, Sha'ib Hibra, Sha'ib Hibrah), 17° 44' 47" N - 43° 8' 53" E, year 1855, H, W. Schimper, 250, (P!), 2. **MAKKAH** (MECCA), Between Bani Sa'd and Jabal Ibrahim, Taif to Al Bahah road, 21 April 1988, (♂), S. Collenette, 6701, (K!), 1. Gedda (Yidda), 14 October 1975, H, Carlo de Marchesetti, s.n., (FI!), 1. Jabal Ibrahim-Al Bahah, Taif road, 2000 m alt., 23 August 1982, (♀), FR, S. Collenette, 3829, (E!), 1. Wadi Fatimah is located within Makkah region in western part of Saudi Arabia., ?, (♂), Fischer, 184, (FI-W!), 1. **YEMEN**, MARIB, Marib to Sanaa road, 20 km, W of Marib (15°25'0"N, 45°21'0"E), 1450 m alt., 5 April 1981, (♀), FR, H, A. Miller & A. Long, 3443, (E!), 1. **RAYMAH**, AlJabin (Al Jabin) to Suq Ar Ribat, 700 m alt., 22 March 1984, (♀), A. Miller & A. Long, 5383, (E!), 1.

#### *P. atlantica* A.Chev.

Cultivars: Calhao, Ilha de Sal, Praia, Sao Vicente.

Accessions E-160: 46(Seed Vegetative Floral) (~~EPSO E09~~), 51(SVF) (~~EPSO E10~~), 170(SV) (Murcia), 177(SVF) (EPSO E12), 179(SVF) (EPSO E13), 242(SVF) (EPSO E06), 315(SVF) (EPSO E07), 316(S), 330(SVF) (~~EPSO E11~~), 512(V), 555(SV) (Palmetum 50, N 249), 683(SVF) (EPSO D07), 1086(SVF) (~~EPSO E08~~), 1127-1128(S), 1129(SV) (Palmetum 50, N 250), 1130(S), 1210(S), 1317(S), 1370-1372(S), 1465(S), 1514(S), 1527(S).

Herbarium specimens: **CABO VERDE**, ISLA DE SAL, Is. de Sal, year 1934, H, Chevalier , 45840, (P!), 2. Is. de Sal, year 1934, (♂), H, Chevalier , 45840, (P!), 2. Is. de Sal, Algodeiro, year 1934, FR, H, Chevalier , 45839, (P!), 2. Is. de Sal, Feijoal, year 1934, (♂), Chevalier, 45840, (P!), 1. Is. de Sal, Martoré, 24 a 30 June 1934, (♂), H, Chevalier, 45840, (P!), 1. Is. de Sal, Palmeira, Palha Verde, year 1934, H, Chevalier , 45840, (P!), 1. Is. de Sal, Pedra Lume, , 26 June 1934 , FR, Chevalier, s.n. , (P!), 1. **ISLA DE SAN THIAGO**, Isle de San Thiago, Praia, Sao Martinho, , year 1934, FR, H, Chevalier, 45854, (P!), 1. Isle de San Thiago, Praia, Sao Martinho, julio de 1934, FR, Chevalier, 45858, (P!), 1. Isle de San Thiago, Praia, dattes vendues sur le marché, year 1934, FR, SE, Chevalier, 45854, (P!), 1. San Thiago Praia , year 1934, (♀), Chevalier , 45851, (P!), 1.



### *P. caespitosa* Chiov.

**Cultivars:** *P. reclinata* var. *somaliensis*: N. Somalia: Bacino del Noghal, steppe fra Hamùr e Gombeia 26. VI (n. 926, 927). S. Somalia: nella boscaglia di Sariar presso Tigieglò 12.III. (n. 262) (Chioyenda 1929).

**Herbarium specimens:** **DJIBOUTI**, TADJOURA, Côte Française de Somalis, Randa, 850 m alt., ?, H. E. Chedeville, 2238, (FT!), 2. Côte Française de Somalis, Randa, 850 m alt., ?, (♀), H. E. Chedeville, 2238, (FT!), 1. Côte Française de Somalis, Randa, 850 m alt., ?, (♂), E. Chedeville, 2238, (FT!), 1. Côte Française de Somalis, Randa, 850 m alt., ?, (♂), H. E. Chedeville, 2238, (P!), 1. Côte Française de Somalis, Randa, 850 m alt., ?, (♂), H. E. Chedeville, 2238, (FT!), 1. Côte Française de Somalis, Randa, 850 m alt., ?, (♂), E. Chedeville, 2238, (FT!), 1. Côte Française de Somalis, Randa, 850 m alt., ?, H. E. Chedeville, 2238, (FT!), 3. Côte Française de Somalis, Randa, 850 m alt., ?, (♂), H. E. Chedeville, 2238, (FT!), 1. **SOMALIA**, BARI, 32 km N of Carin, c. 17 km S of Bosaso, 8 January 1993, (♂), Bally & Melville, 15690, (K!), 1. Bacino del Nogal, steppa fra Hamur e Gombeia, 8°0'N-49°50'E, 26 June 1924, FR, SE, N. Puccioni & J. Stefanini, 927(1017bis), (FT!), 1. Bacino del Nogal, Uadi Run (=Hon, =Hun), 8°0'N-49°50'E, agosto de 1969, FR, B. Lanza, 17, (FT!), 1. Between Bosaso and Karin, 11°05'N, 49°10'E, , 12Jan. 1995, 100 - 300 m alt., 12 January 1995, H. M. Thulin, A. Dahir & A. Hassan, 9016, (UPS), 1. Between Bosaso and Karin, 11°05'N, 49°10'E, 100 - 300 m alt., 12 January 1995, H. M. Thulin, A. Dahir & A. Hassan, 9016, (K!), 1. Comprensorio di Genale, enero de 1953, H. T. Sacco, Sappa & Ariello, 2, (FT!), 1. Galgolo, year 1954, H. T. Sacco, s.n., (FT!), 1. Halin Tug, 26 October 1944, (♀), Glover & Gilliland, 236, (K!), 1. Hamur to Gombeia, 26 June 1924, (♂), N. Puccioni & J. Stefanini, 926, (FT!), 1. Iskushuban, c. 10°16'N, 50°14'E, 280 m alt., 7 July 1980, FR, J. Gillett, 2305(5), (K!), 1. Migiurtini coast, between 'Ereri Jelleho' and 'Martisor Dinsai', 31 May 1924, H. N. Puccioni & J. Stefanini, 659(723), (FT!), 1. Migiurtini coast, Valle di Scorasar, 1 June 1924, (♀), N. Puccioni & J. Stefanini, 672(738), (FT!), 1. Migiurtini coast, Valle di Scorasar, 1 June 1924, H. N. Puccioni & J. Stefanini, 672(738), (FT!), 1. Somalia, year 1912, H. Scassellati, s.n., (FT!), 1. Sursinban, , 19 March 1954, FR, AGIP Mineraria M. Somala, s.n., (FI!), 1. Sursinban, , 19 March 1954, (♀), FR, AGIP Mineraria M. Somala, s.n., (FT!), 1. Sursinban, , 19 March 1954, H. AGIP Mineraria M. Somala, s.n., (FT!), 1. UNCERTAIN, ?, 1 December 1915, H. G. Scacellati, s.n., (FT!), 1. SANAAG, da Carin per Galgalo, , 10 December 1970, H. R. Bavazzano & J. Lavranos, 528, (FT!), 3. SOUTH SOMALIA, Sariar forest c. Tigieglò, 12 March 1924, H. N. Puccioni & J. Stefanini, 262(290), (FT!), 4.

### *P. canariensis* var. *canariensis*

**Cultivars:** Variegada.

**Accesions E-160:** 140(Seed), 155(S), 210(Vegetative) (~~EPSO-G11~~), 216(SV) (Palmetum 44, N 191), 271(S), 280(S), 283(SV), 306(SV) (~~EPSO-H12~~), 331(V), 346(SV) (~~EPSO-H13~~), 405(SV Floral), 407(S), 408(SV) (~~EPSO-N08~~), 481(SV) (~~EPSO-J09~~), 482-483(S), 486(S) (~~EPSO-K08~~), 488(S) (~~EPSO-H07~~), 493-494(S), 495(SV) (~~EPSO-J11~~), 496(S), 497(V) (~~EPSO-N06~~), 513(V), 520(S), 556(S), 561(S) (~~EPSO-J08~~), 565(S) (Palmetum 37, N 383), 567(S) (Palmetum 55, N 47), 570(S) (Palmetum 38, N 387), 575(S), 576(SV) (Palmetum 55, N 356), 577(SV) (Palmetum 55, N 56), 578(S), 579(SV) (~~EPSO-H06~~), 584(SV) (Palmetum 37, N 370), 585(S) (~~EPSO-G10~~), 587(SVF), 588(SV) (Palmetum 31, N 231), 589(S) (~~EPSO-G09~~), 592(S), 593(SV) (Palmetum 55, N 53), 597(SV) (Palmetum 55, N 52), 598(SV) (Palmetum 39, N 238) y (SV) (Palmetum 39, N 242), 599(SV) (Palmetum 55, N 50), 600(SV) (Palmetum 37, N 377), 604(SV) (Palmetum 55, N 62), 605(S), 606(SV) (Palmetum 39, N 246), 607(S), 612(SV) (Palmetum 35, N 237), 614(S), 617(SV) (Palmetum 32, N 240), 619(SV) (Palmetum 35, N 373) y (SV) (Palmetum 38, N 239), 621(SV) (Palmetum 41, N 228), 622(SV) (Palmetum 38, N 236), 623(SV) (Palmetum 41, N 209), 767(SV) (Palmetum 55, N 365), 770-771(S), 772(SV) (Palmetum 55, N 352), 773(SV) (Palmetum 55, N 363), 774-775(S), 776(SV) (Palmetum 41, N 210), 777(S), 778(SV) (Palmetum 55, N 70), 779-780(S), 781(SV) (Palmetum 39, N 220), 782(S), 783(SV) (Palmetum 39, N 221),

784(S), 786-788(S), 792(SV) (Palmetum 39, N 222), 793(SV) (Palmetum 55, N 353), 794-795(S), 797(S), 799(SV) (Palmetum 39, N 212), 800(S), 802(SV) (Palmetum 39, N 248), 809(S), 811(SV) (Palmetum 39, N 224), 812(SV) (Palmetum 12, N 107), 813-814(S), 816(SV) (Palmetum 39, N 241), 817(S), 830(S), 833 (Palmetum 49, N 263), 835(SV) (Palmetum 39, N 219), 836(S), 838(SV) (Palmetum 41, N 227), 839(S), 840(SV) (Palmetum 55, N 362), 841(S), 845(SV) (Palmetum 35, N 411), 846(SV) (Palmetum 55, N 43), 847(SV) (Palmetum 55, N 367), 848(SV) (Palmetum 55, N 359), 849(S), 850(SV) (Palmetum 36, N 407), 851(SV) (Palmetum 16, N 163), 852(S), 853(SV) (Palmetum 39, N 225), 855(SV) (Palmetum 36, N 420), 857(SV) (Palmetum 36, N 408), 858(SV) (Palmetum 41, N 229), 859(SV) (Palmetum 49, N 256), 862(S), 865(SV) (Palmetum 41, N 243), 878(SV) (Palmetum 55, N 368), 879(SV) (Palmetum 48, N 67), 880(SV) (Palmetum 48, N 61), 897-899(S), 901(SV) (Palmetum 30, N 134), 902(SV) (Palmetum 30, N 135), 906(S), 907(SV) (Palmetum 30, N 144), 908(SV) (Palmetum 30, N 147), 909(S), 910(SV) (Palmetum 55, N 354), 911-912(S), 914(SV) (Palmetum 55, N 349), 916-917(S), 919(S), 920(SV) (Palmetum 55, N 360), 922(SV) (Palmetum 54, N 176), 923(SV) (Palmetum 55, N 44), 924(SV) (Palmetum 55, N 66), 925(S), 926(SV) (Palmetum 12, N 106), 927(SV) (Palmetum 55, N 45), 1034(SV) (Palmetum 18, N 283), 1035-1037(S), 1038(SV) (Palmetum 55, N 71), 1039(SV) (Palmetum 12, N 94), 1041-1043(S), 1046(S), 1047(SV) (Palmetum 18, N 278), 1048-1051(S), 1052(SV) (Palmetum 28, N 306), 1054-1056(S), 1058-1061(S), 1062(SV) (Palmetum 18, N 272), 1063(SV) (Palmetum 28, N 312), 1064(S), 1065(SV) (Palmetum 55, N 350), 1066-1068(S), 1070(SV) (Palmetum 55, N 357), 1071(SV) (Palmetum 55, N 69), 1076(S), 1077(SV) (Palmetum 10, N 427), 1088-1090(S), 1092(SV) (Palmetum 20, N 291), 1093(SV) (Palmetum 55, N 72), 1094-1095(S), 1096-1098(S), 1106(SV) (Palmetum 12, N 102), 1107(SV) (Palmetum 12, N 100), 1108(SV) (Palmetum 20, N 328), 1112(SV) (Palmetum 26, N 430), 1113(S), 1114(SV) (Palmetum 20, N 309), 1120(SV) (Palmetum 53, N 332), 1141(SV) (Palmetum 53, N 341), 1179-1180(S), 1183(S), 1190(SV) (Palmetum 55, N 55), 1191(S), 1219(SV) (Palmetum 44, N 199), 1220(SV) (Palmetum 44, N 186), 1221(SV) (Palmetum 44, N 201), 1222(SV) (Palmetum 44, N 202), 1235(SV) (Palmetum 48, N 77), 1236(S), 1238(S), 1249(SV) (Palmetum 44, N 193), 1251(SV) (Palmetum 44, N 205), 1254-1255(S), 1256(SV) (Palmetum 20, N 305), 1310(S), 1315(S), 1321(S), 1332-1341(S), 1345-1351(S), 1353-1357(S), 1359-1361(S), 1363-1365(S), 1376-1378(S), 1387-1389(S), 1394-1401(S), 1405-1406(S), 1410-1411(S), 1412(SV) (Palmetum 27, N 290), 1415(SV) (Palmetum 55, N 41), 1416-1417(S), 1421-1427(S), 1429-1431(S), 1434-1435(S), 1444-1452(S), 1455-1462(S), 1496(S), 1501(S), 1506(S), 1578(S).

Herbarium specimens: **SPAIN**, ISLAS CANARIAS, Canaries, Grande Canarie, ?, (♀), (♂), H, ?, 185969, (FI-W!), 1La Gomera, year 1895, (♀), H, E. Bourgeau, 1014, (P!), 1. La Gomera, year 1895, (♀), H, E. Bourgeau, 1014, (BM!), 1. La Gomera, year 1895, (♀), H, E. Bourgeau, 1014, (FI-W!), 1. La Gomera, year 1895, H, E. Bourgeau, 1014, (FI-W!), 1. La Gomera, Barranco de la Concepción, 8 April 1905, (♀), H, C. Pitard, 367, (P!), 3. San Sebastián de La Gomera, 5 April 1845, (♀), H, ?, 185970, (FI-W!), 1. Tenerife, 1933, year 1933, (♀), Asplund, 858, (K!), 1. Tenerife, La Orotava, year 1887, (♀), H, H. Wilpret, s.n., (FI-B!), 1. Tenerife, La Orotava, year 1887, FR, SE, H, H. Wilpret, s.n., (FI-B!), 1. Tenerife, La Orotava, year 1886, SE, Vilmorin-Andrieux, s.n., (FI-B!), 1. Tenerife, La Orotava, 2 July 1900, (♀), H, J. Börnmüller, 1265, (P!), 4. Tenerife, La Orotava, Jardín Botánico, febrero de 1865, H, P. Sagitz, s.n., (P!), 1. Tenerife, Orotava, , 2 July 1900, (♀), J. Börnmüller, 1265, (K!), 1. Tenerife?, year ?, (♂), H. Wilpret, s.n., (FI!), 1. **ITALIA**, ELBA, La Concia, 15 August 1981, H, T. Fossi-Innamorati, 9, (FI!), 1. **PISA**, Clinica Cui, 31 October 1913, FR, H, M. Savelli, s.n., (FI!), 1. **MARRUECOS**, MARRAKECH-SAFI, Mogador (Essaouira), 20 August 1951, (♂), A. Chevalier, s.n., (P!), 1. **TURQUÍA**, ALANYA, Alanio, Hotel Concordia, 17 December 1918, (♂), A. Barla, 17020, (FI!), 1.

#### *P. canariensis* var. *edulis* Robertson-Proschowsky

Cultivars: Macrocarpa.

Accesions E-160: 241(Seed) (~~EPSO H09~~), 404(S), 437(S) (~~EPSO H11~~), 491(S), 557(S Vegetative) (Palmetum 40, N 369), 558(S) (~~EPSO G08~~), 559(SV) (EPSO J06), 562(SV) (Palmetum 32, N 378) y (SV) (Palmetum 37, N 376), 563(SV) (EPSO G06), 566(SV) (Palmetum

41, N 245), 568(SV) (Palmetum 39, N 247), 569 (S) (~~EPSO K11~~), 571(S), 572(S), 573(SV) (Palmetum 41, N 233), 580(SV Floral) (EPSO K04), 582(S) (~~EPSO G13~~), 583(SVF) (EPSO J07), 586(SV) (Palmetum 38, N 375), 594(SV) (Palmetum 39, N 218), 601(SV) (Palmetum 37, N 379), 602(SV) (Palmetum 38, N 380), 603(SV) (Palmetum 37, N 217), 608(SV) (Palmetum 55, N 68), 609(SV) (Palmetum 38, N 382), 610(S) (Palmetum 38, N 385), 611(SV) (Palmetum 35, N 211), 613(SV) (Palmetum 55, N 73), 615(SV) (Palmetum 40, N 374), 616(SV) (Palmetum 40, N 381), 620(SV) (Palmetum 55, N 65), 631(S) (~~EPSO G07~~), 751(SV) (Palmetum 44, N 198), 752(S), 769(SV) (Palmetum 36, N 416), 785(S), 789(SV) (Palmetum 31, N 232), 790-791(S), 804(SV) (Palmetum 55, N 355), 822(SV) (Palmetum 55, N 361), 823(S), 825(S), 828, 831(SV) (Palmetum 18, N 282), 832(S), 842(SV) (Palmetum 41, N 215), 843(SV) (Palmetum 36, N 412), 844 (SV) (Palmetum 55, N 54), 854(SV) (Palmetum 55, N 42), 856 (SV) (Palmetum 40, N 372), 860-861(S), 863(S), 866(SV) (Palmetum 49, N 262), 900(SV) (Palmetum 55, N 60), 1040(S), 1057(S), 1073(SV) (Palmetum 55, N 351), 1074(SV) (Palmetum 28, N 289), 1075(S), 1087(SV) (Palmetum 28, N 303), 1091(SV) (Palmetum 18, N 285), 1109(SV) (Palmetum 106, N 330), 1110(SV) (Palmetum 27, N 308), 1115(S) (Palmetum 10, N 293), 1192(SV) (Palmetum 55, N 57), 1194-1195(S), 1223(SV) (Palmetum 44, N 196), 1226(SV) (Palmetum 12, N 97), 1227(SV) (Palmetum 10, N 292), 1228(SV) (Palmetum 20, N 311), 1249(SV) (Palmetum 44, N 193), 1312(S), 1316(S), 1322(S), 1324-1326(S), 1339(S), 1432(S), 1437(S), 1442(S), 1490(S).

Herbarium specimens: **USA**, HAWAII, Honolulu, septiembre de 1913, FR, R. Young, s.n., (US!), 1. **ITALIA**, PISA, ?, ?, (♀), (♂), H, Hohenacker, 689, (P!), 1

#### *P. canariensis* var. *porphyrococca* Vasc. & Franco

Cultivars: Lisboa, San Remo, Valencia.

Accesions E-160: 1(Seed Vegetative Floral) (EPSO AL08), 240(SVF) (EPSO N09), 279(S) (~~EPSO N10~~), 333(SV) (~~EPSO N13~~), 334(SV) (~~EPSO N12~~), 421(SVF) (EPSO K09), 436(S), 487(S), 492(S), 515(V), 519(SVF) (EPSO N07), 525(SVF) (EPSO N04), 528 (Palmetum 25, N 142), 529(SVF) (EPSO AA04), 572(SV) (Palmetum 41, N 244 ), 581(S) (~~EPSO H08~~), 673(VF) (EPSO N11), 750(SVF) (EPSO AG02), 761(SVF) (EPSO T05), 764(S), 1045(SV) (Palmetum 27, N 307), 1053(SV) (Palmetum 20, N 295), 1069(S), 1186(SV) (Palmetum 10, N 428), 1250(S), 1276(SV) (Palmetum 25, N 3), 1277(SV) (Palmetum 25, N 2), 1280(SV) (Palmetum 12, N 310), 1329-1331(S), 1436(S), 1440(S), 1466-1467(S), 1478(S), 1488(S).

Herbarium specimens: **SPAIN**, ISLAS CANARIAS, Tenerife, La Orotava, year 1887, FR, SE, H. Wilpret, s.n., (FI-B!), 1. Insul. Tenerife, Camino Largo de la Laguna, 19 December 2017, FR, H, Pérez de Paz, Sosa & Salomone, 52991, (TFC!), 1. Insul. Tenerife, Camino Largo de la Laguna, 19 December 2017, FR, H, Pérez de Paz, Sosa & Salomone, 52991, (LPA!), 1. Insul. Tenerife, Camino Largo de la Laguna, 19 December 2017, FR, H, Pérez de Paz, Sosa & Salomone, 52991, (MUB!), 1. **USA**, WASHINGTON DC., Jardín Botánico?, year 1897, FR, SE, J. Rose, 4017, (US!), 1. Jardín Botánico?, year 1897, FR, H, J. Rose, 4017, (US!), 1. Jardín Botánico?, year 1897, H, J. Rose, 4017, (US!), 1.

#### *P. dactylifera* “Mesopotamia”

Cultivars: Femeninas: Abou Da'an, Abou Meaan (Bu Maan, Abouman), Abu Sabaa, Ajwa (Ajwa Medina), Aksaf, Aleyni, Amber Medina, Amari, Amir Hajj (Haji), Aseela, Ashrasi (Asrashi), Aydea Al Qaseem, Azraq, Badmi, Badrayah, Bahram, Barhee (Barhi), Basra, Bdmalki, Benosh, Bobdiar, Bouma, Bouman, Braim (Braiml), Chichi, Crane, Dabbas, Dairy (Dayri), Dekheni, Dhaheni, Dibbas, Djawani, Dubayni, Ewent, Gantar, Halawy, Helwa, Hiri, Ibrahim (Ebrahimi), Ibri (Jibri), Jauzi, Jesh Naghal, Jesh Ramli, Kabakab, Kabar, Khadrawy (Khadrawi), Khalas (Khalasa, Kala), Khalass el-Dhahira, Khalass Oman, Khara Basra, Khidri, Khir, Khisab, Khiyara, Khor, Khudary (Khudry, Khudri), Khunaizir (Kheneizi = cerdito, Khunaizi, Khenezi), Kustawy (Khastawi), Lulu (Loulou), Mabroom, Maktoom (Maktoumi, Maktum), Manjouma, Marjaban, Medina Kaylanya, Menefi, Msalla, Moussalli, Mumtaza, Naboot Ali, Naboot Sultan, Nagal, Nebeit Seif (Nebut Saif), Om el-Khalass, Ramli, Red Lulu, Reziz, Rizaz, Rothan, Rushydia, Safawin, Safawy (Safawi, Safawy Medina), Sagai Dry, Sagai - Rotab, Sagai, Saylani,

Sayir (Sayer), Shagri, Shalaby, Sheikhani, Sheshe, Shieshi Rotab, Shitur Asfar, Silani, Sillege, Sufri (Sofry, Soofry), Shukkar (Sukary, Sukkary), Sultani (Sultana), Suqaey (Suqai), Tabarzal (Tabirzal), Tadala, Taj, Tamra Safawy, Um al Blaliz, Um al Hamam; Um Alamod, Umm is-Silla, Zahidi (Zaidi) (*produce excelentes dátiles en Orihuela*) (Iraq), Zalimi, Zamlee. Masculinas (polinizadores): Asharasi, Barbán, Khadrawy (Baghdad, Iraq), Ghanami, Hukri, Sumaysmi, Wárdi (Basrah, Iraq) (Popenoe 1913).

Accesions E-160: 8(Seed), 11(S), 15(S), 17(S Vegetative Floral) (EPSO AJ05), 18(SVF) (EPSO AJ03), 19(S), 20(SVF) (EPSO AK03), 21(SVF) (EPSO AK04), 22(SVF) (EPSO AK05), 23(SVF) (EPSO AL07), 24(SVF) (EPSO AJ07), 25(SVF) (EPSO AJ02), 26(SVF) (EPSO AJ04), 27(SVF) (EPSO AM06), 29(S), 32(SVF) (EPSO AJ06), 33(S), 34(S), 35(SVF) (EPSO AK06), 36(SVF) (EPSO AK07), 73(6), 78(SVF) (EPSO AJ08), 197(S), 198(SVF) (EPSO AN06), 199(SVF) (EPSO AN04), 200(SVF) (EPSO AM07), 201(SVF) (EPSO AN07), 288(SVF) (EPSO C13), 360(S), 371(SVF) (EPSO AD04), 399(SVF) (EPSO AK02), 411(SV) (Palmetum 51, 338), 442(SVF) (EPSO AM03), 443(S), 452(SVF) (EPSO AN05), 456(SVF) (EPSO AM04), 669(S), 700-702(S), 707(SV) (Palmetum 12, N 317), 708(SV) (Palmetum 4, N 21), 727-729(SV), 731(SV) (Palmetum 48, N 59), 734(S), 732(SVF) (EPSO AK01), 736(SV) (Palmetum 53, N 49), 737(S), 738(SV) (Palmetum 48, N 79), 741(SVF) (EPSO AJ01), 742(SVF) (EPSO AM01), 743(SV) (Palmetum 48, N 51), 747(SV) (Palmetum 48, N 63), 877(S), 881(S), 1078(SVF) (EPSO C09), 1099(S), 1174(S), 1239(S), 1248(S), 1267(SV) (Palmetum 12, N 105), 1268(S), 1269(SV) (Palmetum 2, N 165), 1270(SV) (Palmetum 16, N 12), 1271(S), 1272(SV) (Palmetum 16, N 13), 1320(S), 1413(SV) (Palmetum 12, N 99), 1420(SV) (Palmetum 12, N 101), 1529(S), 1531-1532(S), 1534-1535(S), 1537-1539(S), 1541(S), 1543(S), 1566-1571(S), 1574(S), 1582(S).

Herbarium specimens: **BAHRAIN**, BAHRAIN Is., without precise locality, 21 February 1926, H. Fernandez, 2863, (K!), 1. **DJIBOUTI**, DIKHIL, Dikhil, 11 February 1985, FR, J. Audrn, 7219, (P!), 1. **ISRAEL**, NORTHERN DISTRICT, Lake Tiberius (Lake Tiberias, Sea of Galilee), year 1860, H. Hooker & Hanbury, s.n. , (K!), 1. **REUNIÓN**, ILE BOURBON, Ile Bourbon, julio de 1837, (♂), C. Gaudichaud, s.n., (P!), 1. **SAUDI ARABIA**, UNCERTAIN, Wadi Hebron, , year 1835, (♀), Schimper, 250, (FI-W!), 1. JIZAN PROVINCE, Near Jizan Dam, , 12 January 1980, H. Chaudhary, E421, (E!), 1. **UNITED ARAB EMIRATES**, SHARJAH, Kalba oasis, , 20 February 1985, (♂), Western , 722, (E!), 1.

### **P. dactylifera “Nile”**

Cultivars: Abyad, Aglan, Aisha (Aesha), Amhat (Amheat), Amri, Arebi, Barakawi, Beda Rufaya, Bent Ashaa (Bint Aisha), Bentamoda, Bint Gundeela, Grundeela/Qundeil, Borky, Burni, Deqqna, El Falek, El-Shabal, Frahi (Frehi), Gagee, Ghazelee (Ghazali), Hayani (Hayany, Haiani), Hegazy (Hegazu), Jao, Kulma soda, Malakabi, Minya Siwa, Mjassar, Nabt, Om el-Frah, Oushek, Pashpag, Peggy Ann, Qandila, Qantar, Rasha, Rotob, Saidy (Saeedi), Samany, Sayidi, Siwy (Siwa), Skootty (Sakkoty), Sphynx, Sultana Bedeen, Tagtagt, TR, Wardi, Zaghloul (Zahlool, Zaghloul), Zehdi.

Accesions E-160: 6(Seed Vegetative Floral) (EPSO AE03), 30(S), 31(SVF) (EPSO AD05), 191(S), 231(SVF) (EPSO AG07), 688(SVF) (EPSO Q07), 689(SV) (Palmetum 30, N 139), 705(SV) (Palmetum 29, N 141), 716(S), 717(SV) (Palmetum 16, N 159), 730(SV) (Palmetum 55, N 48), 740(S), 745(SV) (Palmetum 52, N 34), 768(S), 805(S), 829(SV) (Palmetum 18, N 270), 882(SVF) (EPSO AD01), 883-884(S), 885(SV) (Palmetum 52, N 23), 1027(SV) (Palmetum 52, N 37), 1156(SV) (Palmetum 53, N 339), 1157(S), 1159(S), 1163-1172(S), 1176(S), 1178(S), 1182(S), 1197-1204(S), 1258(S), 1259(SV) (Palmetum 16, N 167), 1260(S), 1261(SV) (Palmetum 2, N 162), 1262(SV) (Palmetum 16, N 14), 1263(SV) (Palmetum 16, N 16), 1264(SV) (Palmetum 16, N 156), 1265(SV) (Palmetum 16, N 153), 1266(SV) (Palmetum 16, N 166), 1369(S), 1386(S), 1390(S), 1402-1404(S), 1433(S), 1470(S), 1473(SV) (Palmetum 51, N 331), 1572-1573(S).

Herbarium specimens: **EGYPT**, ALEXANDRIA, Alexandria, septiembre de 1820, H. C. Ehrenberg, s.n. , (P!), 2. Alexandrie, ?, H. A. Delile, s.n. , (P!), 2. **ASWAN**, Assuan (Syene), ?, (♀), (♂), H. J. Gay, s.n. , (US!), 1. Nile, ?, (♀), Hall, s.n. , (K!), 1. **CAIRO**, Abusir, near El Merq,



, 21 March 1924, (♂), Simpson , 1826, (K!), 1. UNCERTAIN, Egypt, ?, (♂), A. Schimper, s.n. , (US!), 1. Egypt, ?, (♂), H. A. Schimper, s.n. , (P!), 1. Egypt, ?, (♂), H. Coq., s.n. , (P!), 1. Egypt, ?, (♂), Olivier, s.n. , (P!), 1. Egypt, year 1868, H. Vieber, s.n. , (P!), 1. RED SEA, Kosser und Ras-Benass (El Qoseir), year 1864?, (♀), G. Schweinfurth, 1423, (P!), 1. **ISRAEL**, TEL AVIV, Jaffa, the southern and oldest part of Tel Aviv–Yafo, is an ancient port city in Israel., ?, H. American Colony Jerusalem , 985, (US!), 1. **STATE OF PALESTINE**, JERICHO, Jericho, , 1 April 1913, (♂), American Colony Jerusalem , 6985, (K!), 1.

#### **P. dactylifera “Persia”**

Cultivars: Bú Narinja = Sakkary (Persian Gulf) (Popenoe 1913), Chaarù Dsjemaal\*, Chaarù Derjaí\*, Churmà-Serrèk\*\*, Churmà Sjahunì (= The Royal Dates) \*\*, Churma Sjekkerì\*\*, Chuusj Gowaar\*, Chwsj Chaar\*, Dsjausì\*\*, Dsjehrumì\*\*, Faarsi (Farsi), Falakuun\*, Halilì\*\*, Harmayi Sadrati, Khasoy, Khurma (Khurmo), Kimia, Kokna, Kuungìrd\*, Mahmuudì\*, Miwahì\*, Mordasengì\*\*, Musatì\*\*, Nardsjilì\*, Pijaruun (Pyarom, Piarom, Pyarum)\*, Qasab, Rabee, Resjt=Lesjt\*, Sahidì\* (Iran), Saidi, Seluunì\*, Serd\*\*, Unabì\*\*, Wandulalì\* (Asteriscos = \*\*Dátiles de calidad suprema y \*Dátiles de primera calidad según Kaempfer (1712)).

Accessions E-160: 187(Seed Vegetative Floral) (EPSO AQ08), 369(SVF) (EPSO AQ04), 370(SVF) (EPSO AF01), 446(SVF) (EPSO AQ02), 447(SVF) (EPSO AQ03), 448(SVF) (EPSO AQ06), 449(SVF) (EPSO AM02), 450(SVF) (EPSO AQ01), 632(SV) (Palmetum 48, N 78), 711(SV) (Palmetum 48, N 75), 1237(SV) (Palmetum 12, N 92), 1342(S), 1420(SV) (Palmetum 12, N 101), 1545(S).

Herbarium specimens: **IRAN**, KERMAN, Chabbis (Bam), 27 March 1859, (♀), (♂), A. de Bunge, s.n. , (P!), 1. Chabbis (Bam), 27 March 1859, (♀), H. A. de Bunge, s.n. , (P!), 1. Chabbis (Bam), abril de 1859, (♀), A. de Bunge, s.n. , (P!), 1. Chabbis (Bam), abril de 1859, (♂), A. de Bunge, s.n. , (P!), 1. **JAMAICA**, UNCERTAIN, Jamaica, ?, H. H. Sloane, s.n. , (BM!), 1.

#### **P. dactylifera “Socotra”**

Cultivars: Ambara, Aqiba, Arhino Green, Arhino Red, Ayash (Ayasa), Bagal Abdullah, Bagal Abyad, Bahlani, Barni (Berni=Birni), Bayara, Bounaringa, Burshi, Dha Dahad, Dini, Emirati, Fardh (Fard), Fard OPS, Fardh Ahmar, Hassass, Hilali (Oman), Hob, Houkam, Jabri, Kashkar, Khasab, Khinezi, Kush Batash, Kush Zebda (Mascate), Mabseli, Nafs es-Seif, Naghal (Nahal), Naghal Hilali, Naghayli, Nameishi, Nashu el Khashba, Nashu el Wahra, Nawader, Qamoos, Qash Abash, Qash Arabi, Qash al Wali, Qash Bismin, Qash Hamid bin Gharib, Qash zabad, Qaswich, Qatarah (Kattara), Rabigh, Rajab, Sarafana, Seima, Siyali, Sudra, Zebad (Zebda).

Accessions E-160: 9(Seed), 28(S), 311(S), 366(S), 389(S), 410(S Vegetativos Floral) (EPSO AM05), 453(SVF) (EPSO AN08), 457(S), 478(SVF) (EPSO AP06), 479(SVF) (EPSO AP07), 514(SVF) (EPSO AP05), 515(S), 518(SVF) (EPSO AP08), 636(SVF) (EPSO AP04), 637-639(S), 640(SV) (Palmetum 18, N 281), 641(S), 642(SV) (Palmetum 18, N 279), 643(SVF) (EPSO B09), 644(SVF) (EPSO AP03), 645 (Palmetum 18, N 288), 739(S), 748(S), 757(SV) (Palmetum 18, N 275), 758(S), 1079(S) (~~EPSO J13~~), 1080(SVF) (EPSO AP02), 1082(SV) (Palmetum 18, N 274), 1083(SV) (Palmetum 18, N 284), 1085(SVF) (EPSO AP01), 1247(SV) (Palmetum 12, N 327), 1273(SV) (Palmetum 2, N 161), 1311(S), 1530(S), 1533(S), 1536(S), 1540(S), 1542(S), 1548-1554(S).

Herbarium specimens: **YEMEN**, SOCOTRA, Hagghiher Mts, Kishen, 12°35'N, 50°03'E, , 1 May 1967, (♀), Smith & Lavranos, s.n. , (K!), 1.

#### **P. dactylifera “Chevalier”**

Cultivars: De adobo, Edahed, Normales de Ojós, Sekani, Verdál (Murcia, Spain) (Escribano 1884; Rivera et al. 1997).

Accessions E-160: 110(Seed Vegetative Floral) (EPSO O08), 111(SVF) (EPSO P07), 113(SVF) (EPSO O10), 706(SV) (Palmetum 51, N 35), 806(SV) (Palmetum 41, N 226), 1030(SV) (Palmetum 4, N 30), 1032 (Palmetum 52, N 40), 1224(SV) (Palmetum 53, N 329), 1225(SV) (Palmetum 13, N 424), 1278(SV) (Palmetum 4, N 36, ~~EPSO AG(M04)~~), 1484(S).

Herbarium specimens: **MARRUECOS**, MARRAKESH-SAFI, High Atlas, near Marrakech, , , 450 m alt., 26 June 1971, (♀), Bocquet , 11071, (BM!), 1. SOUSS-MASSA, Between Tiznit and Agadir, , 18 December 1951, (♀), FR, Chevalier, s.n. , (P!), 1.

#### *P. dactylifera* var. *costata* Becc.

Cultivars: Daurats, Santomera, Valencia, Verts.

Accessions E-160: 81(Seed Vegetative Floral) (EPSO A11), 85(S), 88(S), 222(S). 423(S), 441(SVF) (EPSO M05), 444(SV) (Palmetum 27, N 304), 526(S), 710(SV) (Palmetum 10, N 298), 1480-1481(S).

Herbarium specimens: **SPAIN**, VALENCIA, Valencia, ?, FR, SE, L. Christ, s.n. , (FI-B!), 1.

#### *P. dactylifera* var. *cylindrocarpa* Mart.

Cultivars: Abdel Azaz, Abel, Abu Faqqus, Adam Adaalee, Adam Admaan, Adam Ahartan, Adam Bujamaa, Admoo, Agalid, Agar, Aghammu, Aghram Aghzâl, Agiwa, Agmedhina, Aguelid, Ahardane, Ahmar, Ajoujil, Akerbouche, Alig (Allig), Almesry, Arichti, Asemmat, Assiani (Assiane), Assouli, Azaghaw, Aziza, Aziza Manzou, Bagass, Bahdid, Barmel, Barthamoda, Bawa'adhim, Bekri-khder, Belahzit, Bent Eshark, Bent Keballa (Ben Keballa, Bent Qbala, Bent Kebella), Beser Helou (Besser Helou), Bezania, Bid-djaj (Bit Djej, Biddajaj), Bidh-Hmam, Black Bou Sthammi, Booserdoon, Boozekri, Boukhanda, Bemmekhluf, Bou Fagous, Boufaggous Marocain (Boufkous), Boufagous Gharas, Boufegous rqi, Bou Khalfoun, Bourchanou, Bourer, Bouslikh (Bouslikhn, Bousl Khine), Bournow, Boussakri, Bouzagza, Bouzegar, Boyer, Bukezzine, Burmeel, Chataya, Cheddakh, Chikh, Deglah (Ddagla), Degla Behia, Deglet Ayshah, Deglet Beida (Degla Beida, Deglet Baida, Deglet Bayda, Deglet Bey), Deglet Gaid, Deglet Grand, Deglet Gurara, Deglet Jito, Deglet Mabroom, Dfor Lgot, Dhahbia, Dguel Mghas, Dguel Sidi Khilil, Empress, Fegous (Fagous), Fegous-ghlid, Gasbi, Ghars, Goundi, Guelma, Hafs, Halwat Jabnoun, Hameera, Hamra (Hamrata), Hissaya (Hissa), Hmira, Horra, Ighes N'wagada, Iklane, Iteema (Yteema), Jihel, Kamla, Kenticha (Kentichi), Khad Khadem, Khadhour, Khadraya, Khadri, Khalt-Lhammar, Khalt-Maalek, Khalt-Yabis, Khalt Boulifa, Khalt el Aroussi, Khaneh Rohah, Khessab, Khouet Ftimi, Korkobi, Labouzia, Lagou, Lakhal, Lemsi, Louzi, Mahalbit, Mamedow, Ma'tug, Mcharret, Meteta, Mkarmesh, Moghzazi, M'Selaya, Nafoukhi, Nahla Hamra, Nahla Lebed, Najda, Nasser Oussaleh, Neffakha, Nefret (Nefred), Okht Goundi, Oskri, Ouarglia, Oulifi, Oum Nhel, Ouzamig, Qaqraqoda, Red, Rhars, Sayass, Sbaa Arous, S'Beia Hadded, Sel Wablaa, Shetwia, Siseti, Smiti, Tachlilat, Tadala, Tadmunt (Tadmant), Tafeziwin, Tagiat, Tahmoot, Takermoust, Takhoudrayt, Tamaright, Tameche Kererte, Tanslit, Tantebecht (Tanteboucht), Taramount, Tarzawa (Tarzaoua), Tati, Tawadant, Tazarzayet, Tazerzist, Tazgaght, Tazizoot (Tazizawt), Tazougart, Teeflahny, Tentakan, Tgaza, Tiferete, Tijibe, Timakur, Timedjwel, Timjouhart, Tin Aser (Teenasar, Tnasar), Tinazidhane, Tinhud, Tinizine, Tinrigh, Thoory (Thorry, Thory), Tizouyadj, Wahardan, Wahtardow.

Accessions E-160: 2(Seed Vegetative Floral) (EPSO AE05), 3(SVF) (EPSO AD06), 5(SVF) (EPSO AE06), 10(S), 13(S), 74(SVF) (EPSO AG06), 112(SVF) (EPSO P05), 117(S), 119(SVF) (EPSO M08), 123-124(S), 188(S), 281(SV) (Palmetum 10, N 302), 361(S), 445(S), 489(SVF) (EPSO AG03), 618(S), 627(SVF) (EPSO AF03), 628(SVF) (EPSO AD03), 665-668(S), 704(S), 733(SV) (Palmetum 48, N 364), 735(SVF) (~~EPSO AE01~~), 738(SV) (Palmetum 48, N 79), 744(SVF) (EPSO G12), 749(SV) (Palmetum 51, N 343), 807(SV) (Palmetum 12, N 93), 966(SVF) (Palmetum 1, N 500) = 53, N 26), 1017(S), 1018(SVF) (EPSO Q05), 1019 (Palmetum 51, N 342), 1020(SVF) (EPSO AG01), 1021(SVF) (~~EPSO Q04~~), 1022(SV) (Palmetum 52, N 33), 1028(SVF) (EPSO AD02), 1029(SV) (Palmetum 51, N 347), 1031(S), 1081(SV) (Palmetum 51, N 337), 1084(SV) (Palmetum 51, N 348), 1102(SV) (Palmetum 49, N 265), 1103(SV) (Palmetum

13, N 431), 1152(SV) (Palmetum 53, N 345), 1153(SV) (Palmetum 53, N 346), 1154(S), 1158(SV) (Palmetum 55, N 366), 1160(S), 1213(SV) (Palmetum 53, N 340), 1214(SV) (Palmetum 53, N 24), 1215(SV) (Palmetum 12, N 96), 1216(SV) (Palmetum 4, N 17), 1217(SV) (Palmetum 49, N 264), 1229(S), 1231(SV) (Palmetum 49, N 254), 1233(S), 1234(SV) (Palmetum 53, N 39), 1240(S), 1241(SV) (Palmetum 55, N 80), 1242(SV) (Palmetum 12, N 104), 1279(SVF) (EPSO AF02), 1463-1464(S), 1472(S), 1508-1511(S), 1546-1547(S), 1555-1564(S), 1583(S).

Herbarium specimens: **ARGELIA**, ALGER, Algiers?, year 1888, FR, SE, Christ, s.n. , (FI-B!), 1. BISKRA, Biskra, 12 April 1877, H, P. Jourdan, s.n. , (P!), 1. Biskra, ?, (♂), P. Janieu, s.n. , (P!), 1. Biskra, ?, (♂), H, P. Janieu, s.n. , (P!), 1. EL OUED, Ourlana (Ourglana), 5 April 1880, (♂), P. Jourdan, s.n. , (P!), 1. GAFSA, Gafsa, año 1881, H, J. Reboud, s.n. , (P!), 1. GHARDAIA, El Goléa (El Menia), diciembre de 1931, FR, A. Chevalier, s.n. , (P!), 1. El Goléa (El Menia), febrero de 1880, H, P. Jourdan, s.n. , (P!), 1. LAGHOUAT, Laghouat, 10 April 1870, (♂), Samary, s.n. , (P!), 1. Laghouat, 5 de junio de 1858, H, Cosson?, s.n. , (P!), 1. TAMANRASSET, (Oasis de Ur-aier) Tassili n'Ajjer?, ?, (♂), C. de B., s.n. , (MA!), 1. **FRANCIA**, VAR, Hyeres, cultivé, marzo de 1868, H, C. de B., s.n. , (P!), 1. Toulon, Jardin botanique, ?, (♀), ?, s.n., (P!), 1. **GUINEA**, FOUTA DJALON, Labé, octubre de 1954, H, R. Schnell, 7336, (P!), 1. **HAITI**, ANTIBONITE, Antibonite, 19°27'N-72°42'W, ?, FR, Zanoni, Megía & García, 35203, (US!), 2. Antibonite, 19°27'N-72°42'W, ?, H, Zanoni, Megía & García, 35203, (US!), 1. **LIBIA**, CYRENAICA, Kufra oases, 23 August 1963, H, Cambridge Expedition , 18, (K!), 1. **MALI**, FOUTA DJALON, Fouta Djallon, septiembre de 1954, FR, R. Schnell, 7224, (P!), 1. MOPTI REGION, Bandiagara (Biandagara), junio de 1932, (♀), FR, J. Rogeon, s.n., (P!), 1. **MAURITANIA**, ADRAR, El Wod, 20°32'N-12°14'W, 19 February 1996, FR, H, Lamarche, 845, (P!), 1. Guelta d'Hij, Teguel, c. Azoug, 8 December 1976, H, Tihemud, 16094, (P!), 1. **NIGER**, AIR, Cillatery pres du Niger, 19 July 1932, FR, H, J. Rogeon, 512, (P!), 1. Mounts Baghezam, Amalaolit, years 1930-1932, FR, H, J. Rogeon, s.n., (P!), 1. **TCHAD**, UNCERTAIN, Sommet Ziver, 15 May 1978, H, Seignobos, 49595, (P!), 1.

#### P. excelsior Cav.

Cultivars: **SPAIN** (Elche, Orihuela, Abanilla y Valle de Ricote): Candíos (Candits), De Adobo Dorados (D'adob Daurat), De Adobo Negros (D'adob Negre), Jihal (Juhhal = dátiles buenos para los niños, Jihl), De Sol, Maduros (Maur), Medianos de Ojós, Negros (Negres), Rojos, Rojos Tempranos, Tenaicos (Tenats), Tiernos (Tendres), Verdes Negros (Verts Negres). América (Misiones de Baja California): Caramelo, Criollo, San Ignacio, San Ignacio Grande.

Accesions E-160: **SPAIN:** 69(Seed Vegetative Floral) (EPSO M07), 70-71(S), 72(SVF) (EPSO U06), 104(S), 105(SVF) (EPSO AB03), 106(SVF) (EPSO Y07), 108(SVF) (EPSO O12), 115(SVF) (EPSO M12), 116(S), 118(S), 120(SVF) (EPSO M09), 121(SVF) (EPSO M06), 122(SVF) (EPSO M10), 125(S), 126(SVF) (EPSO V07), 127(SVF) (EPSO U07), 128-129(S), 130(SVF) (EPSO X07), 131-133(S), 172(SV) (~~EPSO P06~~), 173(SV) (~~EPSO O05~~), 186(V), 217(SVF) (EPSO R07), 218-223(S), 224(SVF) (EPSO V06), 225-230(S), 251(SVF) (EPSO Y03), 268(SVF) (EPSO S05), 269(SV) (~~EPSO AA07~~), 270, 272-273(S), 274(SV) (Palmetum 10, N 299), 305(S), 309(S), 343-344(S), 345(SVF) (~~EPSO AB02~~), 356(SVF) (EPSO R06), 357(SVF) (EPSO X06), 359(S), 363(SV) (Palmetum 25, N 7), 395-398(S), 412(S), 413(SVF) (EPSO AB05), 414(SVF) (EPSO AB07), 415(SVF) (EPSO AA05), 416(SVF) (EPSO Y04), 417(SVF) (EPSO AA03), 418(SVF) (EPSO Y06), 419-420(S), 422(SVF) (EPSO X04), 427(SVF) (EPSO AA06), 428(S), 430(SVF) (EPSO X05), 431(SVF) (~~EPSO Y02~~), 432(SVF) (EPSO AB06), 433(SVF) (EPSO U05), 434(SVF) (EPSO V05), 435(S), 460(SV) (~~EPSO U04~~), 461(SVF) (EPSO V04), 462(S), 502(SVF) (EPSO O11), 505(SV) (Palmetum 25, N 137), 524(S), 527(SVF) (EPSO S06), 529(S), 531(SV) (Palmetum 25, N 8), 532(SV) (Palmetum 25, N 129), 534(SV) (Palmetum 21, N 143), 537(SV) (Palmetum 20, N 294), 538(S), 539 (Palmetum 25, N 6), 540(SVF) (EPSO M04), 541(S), 542(SV) (Palmetum 52, N 20), 543(SVF) (~~EPSO Y02~~), 544(S), 545(SV) (Palmetum 10, N 297), 546-547(S), 548(SV) (Palmetum 20, N 132), 549(SV) (Palmetum 10, N 301), 550-554(S), 564(SV) (Palmetum 32, N 371), 591(S), 595(S) (Palmetum 31, N 384), 596(S), 633(S), 675(SVF) (EPSO O07), 676(S) (~~EPSO O06~~), 679(SVF) (EPSO P04), 681(SVF) (EPSO

M11), 692(SV) (Palmetum 10, N 296), 693(S), 694(SV) (Palmetum 25, N 131), 695(SVF) (~~EPSO AB04~~), 696(S), 697(SV) (Palmetum 25, N 130), 698(SV) (Palmetum 25, N 5), 699(SVF) (~~EPSO R04~~), 718-720(S), 721(SVF) (EPSO V03), 796(S), 808(S), 810(S), 815(S), 818-820(S), 824 (Palmetum 49, N 255), 827 (Palmetum 49, N 261), 834-835(S), 837(S), 903-905(S), 913(SV) (Palmetum 55, N 74), 915(S), 921(S), 1011(SVF) (~~EPSO U03~~), 1012(SV) (~~Palmetum 24, N 1~~), 1013(S), 1111(S), 1116-1117(S), 1122-1126(S), 1131(SV) (Palmetum 30, N 133), 1132-1134(S), 1135(SV) (Palmetum 53, N 344), 1136(SV) (Palmetum 25, N 145), 1137(S), 1138(SV) (Palmetum 26, N 426), 1139-1140(S), 1142(SV) (Palmetum 29, N 136), 1143-1145(S), 1146(SV) (Palmetum 13, N 435), 1147(S), 1148(SV) (Palmetum 26, N 436), 1149-1151(S), 1155(SV) (Palmetum 18, N 286), 1162(S), 1196(SV) (Palmetum 50, N 251), 1218(S), 1244(SV) (Palmetum 18, N 277), 1275(S), 1281-1301, 1302(SV) (Palmetum 55, N 46), 1303-1309(SV), 1319(S), 1327-1328(S), 1344(S), 1352(S), 1366-1368(S), 1417(SV) (Palmetum 12, N 89), 1439(S), 1476-1477(S), 1479(S), 1485-1486(S), 1489(S), 1491(S), 1497(S), 1513(S). BAJA CALIFORNIA: 82(SVF) (EPSO B11), 83(SVF) (EPSO C12), 84(S), 86(S), 89(S), 90(SVF) (EPSO B12), 91-94(S), 95(SV) (Palmetum 55, N 64), 96(SVF) (EPSO B10), 97-98(S), 99(SVF) (EPSO C10), 100-102(S), 238(SVF) (EPSO A12), 289(SVF) (EPSO A13), 290(SVF) (EPSO B13), 1407(S).

Herbarium specimens: **BRASIL**, SANTA CATARINA, Florianópolis, Jardim Oliveira Belo, 16 April 1971, (♀), H. Klein & Breselin, 9379, (US!), 2. Florianópolis, Jardim Oliveira Belo, 16 April 1971, FR, Klein & Breselin, 9379, (US!), 1. **CUBA**, CAMAGÜEY, Nuevitas, Camagüey, marzo de 1909, H. J. Shafer, 787, (US!), 1. **CURAÇAO**, CURAÇAO, Curaçao, 16 March 1917, H. H. Curran & H. Haman, 263, (US!), 1. **EL SALVADOR**, SAN SALVADOR, San Salvador, agosto de 1922, FR, H. S. Calderón, 1111, (US!), 1. San Salvador, agosto de 1922, FR, S. Calderón, 1111, (US!), 1. San Salvador, agosto de 1922, (♂), H. S. Calderón, 881, (US!), 1. **SPAIN**, ALICANTE, Elche, year 1825, SE, H. Durieu, 118, (P!), 1. Elche, huertos, 10 November 2004, (♂), A. Galán, 333, (MA!), 1. Elche, huertos, 10 November 2004, H. A. Galán, 333, (MA!), 1. Elche, huertos en la salida hacia Santa Pola, 10 November 2004, FR, SE, A. Galán, 336, (MA!), 1. Elche, Estación Experimental Agraria de Elche, 21 November 2018, FR, SE, H. C. Obón & J. Bartual, 240201, (VAL!), 1. Elche, Estación Experimental Agraria de Elche, 21 November 2018, FR, SE, H. C. Obón & J. Bartual, s.n., (ABH!), 1. Elche, Estación Experimental Agraria de Elche, 21 November 2018, FR, SE, H. C. Obón & J. Bartual, s.n., (UMH!), 1. Elche, Estación Experimental Agraria de Elche, 21 November 2018, FR, SE, H. C. Obón & J. Bartual, s.n., (MA!), 1. Elche, huertos en la salida hacia Santa Pola, 10 November 2004, H. A. Galán, 336, (MA!), 1. **BARCELONA**, Barcelona, marzo de 1913, (♀), (♂), Sennen, 1807, (BM!), 1. **MURCIA**, Abanilla, en huertos, 9 November 2004, H. A. Galán, 338, (MA!), 1. . Abanilla, en huertos, 9 November 2004, FR, H. A. Galán, 338, (MA!), 1. Entre Barinas y Abanilla, rambla de Balonga, 10 November 2004, FR, H. A. Galán, 335, (MA!), 1. Entre Barinas y Abanilla, rambla de Balonga, 10 November 2004, H. A. Galán, 335, (MA!), 1. Murcia, , abril 1854, (♀), (♂), Deseglise, 2314, (BM!), 1. **USA**, CALIFORNIA, Samuel Valley, 2 July 1894, H. L. Schonfeldt, 3856, (US!), 1. San Diego, Samuel Creek, 5 July 1894, H. E. Mearns, 3890(461), (US!), 1. **WASHINGTON DC.**, Washington, septiembre 1899, H. C. Pollard, s.n., (US!), 1. **MÉXICO**, BAJA CALIFORNIA, Cape San Lucas, agosto de 1859, H. L. Xanthus, 112, (US!), 1. BAJA CALIFORNIA, Cedros Island, 11 March 1911, FR, H. J. Rose, 16147, (US!), 1. **YUCATÁN**, Rancho San Joaquín, cerca de Mayapán, 1 March 1865, H. Schott, 749, (US!), 1. **PUERTO RICO**, PONCE, near Ponce, 8 July 1901, H. L. Underwood & R. Griggs, 723, (US!), 1.

#### **P. dactylifera “Mednoor”**

Cultivars: Abada (Abbada), Alaassyane, Blonde Beauty, Bouskri, Brunette Beauty (Brunette), Confitera, Deglet Large, Deglet Nour (Tunica), Deglet Nour Hourra, Deglet Petite, Grenja, Hafsa, Hamraya (Hamray, Hamri), Haziz, Honey, Los Mejores de Ojós, Maajun, Majhul (Majhool), Medjool (Marruecos), Menakher (Menukher), Muy Buenos de Ojós, Ravier, Tagarbushet, Takerboosh (Takerboucht), Tamjhourt (Tamr Jurrat), Tilemsu (Telemsoua). De Berberia (SPAIN, Escribano 1884).



Accessions E-160: 7(Seed Vegetative Floral) (EPSO C11), 12(SVF) (EPSO AF06), 14(SVF) (EPSO A10), 16(SVF) (EPSO AF04), 75(S), 76(SVF) (EPSO AD07), 79(SVF) (~~EPSO AK08~~), 80(SVF) (~~EPSO AE07~~), 365(SVF) (EPSO AE04), 400(S), 401(SVF) (EPSO J10), 424(SVF) (EPSO AF05), 425(SVF) (EPSO AG05), 426(SVF) (EPSO AG04), 429(SV) (Palmetum 12, N 90), 455(SVF) (~~EPSO AE02~~), 523(S), 534 (Palmetum 21, N 143), 624(SV) (Palmetum 37, N 386), 625(SV) (Palmetum 37, N 388), 626(SV) (Palmetum 55, N 58), 635(SV) (~~Palmetum 48, N 4~~), 709(SV) (Palmetum 25, N 1), 746(S), 753(SV) (Palmetum 25, N 146), 754(SV) (Palmetum 25, N 4), 798(SV) (Palmetum 54, N 170), 895(SV) (Palmetum 4, N 27), 896(SV) (Palmetum 53, N 29), 1013(S), 1014(SV) (Palmetum 12, N 318), 1015(SV) (Palmetum 53, N 18), 1016(SV) (Palmetum 51, N 336), 1033(SVF) (EPSO M13), 1193(S), 1211(SV) (Palmetum 4, N 19), 1212(S), 1230(SV) (Palmetum 4, N 22), 1232(SV) (Palmetum 49, N 266), 1344(S), 1453-1454(S), 1575(S).

Herbarium specimens: **FRANCIA**, SEINE INFÉRIEURE, Le Havre, 15 September 1928, FR, H, P. Senay, s.n., (P!), 1.

### *P. farinifera* Roxb.

Cultivars: Madurai (cultivada en Kuwait y utilizada para cruzamientos experimentales con *P. dactylifera*) (Sudharsan 2004).

Accessions E-160: 134(S), 136(S), 327(S).

Herbarium specimens: **AUSTRIA**, VIENNA, Jardín botánico de Viena, ?, H, ?, s.n., (P!), 1. **INDIA**, ANDHRA PRADESH, Cuddapah Distr., febrero de 1883, H, Gamble, 11105-11106, (K!), 1. COROMANDEL, ?, ?, (♂), H, Tchampalon, 268(262), (P!), 1. Chennai (Madras), year 1880, (♂), Bidie, s.n., (US!), 1. Chennai (Madras), year 1880, (♂), H, Bidie, s.n., (P!), 1. UNCERTAIN, Zavai?, ?, H, Zollinger, 3098, (P!), 1. KERALA, Trivandrum, Veli, sea-level, 25 January 1995, (♀), S. Barrow & Bunoi, 51, (K!), 1. Trivandrum, Veli, sea-level, 25 January 1995, (♂), S. Barrow & Bunoi, 52, (K!), 1. Trivandrum, Veli, sea-level, 25 January 1995, (♀), S. Barrow & Bunoi, 51, (TBGRI!), 1. Trivandrum, Veli, sea-level, 25 January 1995, (♂), S. Barrow & Bunoi, 52, (TBGRI!), 1. TAMIL NADU, (Attur Range) Periakalrayans, 22 September 1978, (♀), Venugopal & Manoharan, 17610, (RHT!), 1. (Coimbatore Distr.), year 1882, (♂), Brandis, s.n., (FI-B!), 1. (Madras Distr.): Chingleput, near Sadras, 23 February 1933, (♀), Cheviat Jacob, 80414, (K!), 1. (Salem Distr.): (Mettur range) Peria Thanda N Bagpur R.F., 19 December 1976, (♀), Matthew & Alphonse, 5884, (RHT!), 1. (Shevaroy's South Range) Thekkampatti, 10 May 1978, (♀), Mohan, 13476, (RHT!), 1. (South Arcot Distr.): Takarai R.F., 19 January 1978, (♀), Ramamurthy, 52846, (CAL!), 1. (Tanjore Distr.), 21 March 1978, (♀), Matthew, 12568, (RHT!), 1. (Tinnevely Distr.) Nateriakal, c. 900 - 1200 m alt., 12 February 1913, H, Hooper & Ramaswami, 38454, (CAL!), 1. (Uludurpet Range) Pulloorkkadu, 3 December 1979, (♀), Matthew, 25097, (RHT!), 1. Mariappa nagar, 10 January 1978, (♂), Mohan, 11282, (RHT!), 1. Srirangam Is, 31 January 1995, (♀), Matthew & Barrow, 65A, (RHT!), 1. Srirangam Is, 31 January 1995, (♂), Matthew & Barrow, 65B, (K!), 1. Srirangam Is, 31 January 1995, (♂), Matthew & Barrow, 65B, (RHT!), 1. Srirangam Is, Sobanapuram, 31 January 1995, (♀), Matthew & Barrow, 65A, (K!), 1. Vridachalam, 1 February 1980, (♀), Matthew, 26255, (RHT!), 1. **SRI LANKA**, (ANURADHAPURA DISTRICT.), along road to Talava, 16 June 1969, H, R. Read, 2184, (US!), 2. along road to Talava, 16 June 1969, H, R. Read, 2165, (US!), 2. along road to Talava, 16 June 1969, FR, R. Read, 2165, (US!), 1. along road to Talava, 16 June 1969, FR, R. Read, 2188, (US!), 1. along road to Talava, 16 June 1969, (♀), R. Read, 2188, (US!), 1. along road to Talava, 16 June 1969, H, R. Read, 2166, (US!), 1. along road to Talava, 16 June 1969, H, R. Read, 2166, (US!), 2. (JAFFNA DISTRICT.), Point Pedro, Kaddaikadu, sea level, 16 March 1973, (♂), Bernardi, 14250, (PDA!), 1. Point Pedro, Kaddaikadu, sea level, 16 March 1973, FR, Bernardi, 14250, (US!), 1. Point Pedro, Kaddaikadu, sea level, 16 March 1973, H, Bernardi, 14250, (US!), 1. (MATALE DISTRICT.), Dambulla to Sigirya road near Kibissa, 180 m alt., 8 February 1995, (♀), S. Barrow & Weerasooriya, 69, 71, (K!), 1. Dambulla to Sigirya road near Kibissa, 180 m alt., 8 February 1995,

(♂), H. S. Barrow & Weerasooriya, 70, (K!), 1. Dambulla to Sigirya road near Kibissa, 180 m alt., 8 February 1995, (♀), S. Barrow & Weerasooriya, 69, 71, (PDA!), 1. Dambulla to Sigirya road near Kibissa, 180 m alt., 8 February 1995, (♂), H. S. Barrow & Weerasooriya, 71, (PDA!), 1. Sinharaja Forest, 8 March 1992, (♂), De Zoysa, 28, (PDA!), 1.

#### *P. iberica* D.Rivera, S.Ríos & Obón

Cultivars: Ricabacica (David Correa), Rambla de la Parra, Viveros Ajauque (Rubén Vives).

Accesions E-160: 77(Seed), 169(S), 174(SVF) (EPSO O13), 178(SVF) (~~EPSO I11~~), 275(SVF) (EPSO I10), 276(SVF) (EPSO I06), 277(SVF) (EPSO I05), 278(SVF) (EPSO I07), 509(SVF) (EPSO I08), 510(SVF) (EPSO X03), 671 (SVF) (~~EPSO I12~~), 677(SVF) (EPSO I09), 678(SVF) (~~EPSO K12~~), 722(S), 959(V) (~~Palmetum 22, N 9~~), 960(SV) (~~Palmetum 22, N 10~~), 961(V) (~~Palmetum 22, N 11~~), 962(V) (~~Palmetum 22, N 12~~), 963(V) (~~Palmetum 22, N 13~~), 964(V) (~~Palmetum 22, N 14~~), 965(V) (~~Palmetum 22, N 15~~), 1010(SVF) (~~EPSO I13~~), 1243(SV) (Palmetum 13, N 432), 1474(S), 1484(S).

Herbarium specimens: **SPAIN**, MURCIA, Murcia, year 1863, (♂), J. Lange, s.n. , (P!), 1. MURCIA, Murcia, abril de 1854, (♂), A. Guirao, 2314, (P!), 1. Murcia, abril de 1854, (♂), H. A. Guirao, 2314, (P!), 1. Murcia, abril de 1852, (♂), A. Guirao, 2314, (P!), 1. Río Chícamo, Abanilla, 14 January 1996, FR, H, D.Rivera, S.Ríos & Obón, 47696, (MUB!), 1.

#### *P. iberica* "Abanilla"

Cultivars: Isla Plana (Jorge Sánchez, ANSE), Viveros Ajauque (Rubén Vives), Maurs, Redondos.

Accesions E-160: 67-68(Seed), 103(S Vegetative Floral) (EPSO S07), 107(S), 109(SVF) (EPSO O04), 114 (SVF) (EPSO O09), 192(SVF) (EPSO R04), 362(S), 364(S), 438(SVF) (EPSO AA02), 439(SVF) (EPSO Y05), 440(SVF) (EPSO S04), 459(S), 521(SV) (Palmetum 10, N 300), 691(SV) (Palmetum 53, N 334), 1245 (Palmetum 13, N 433), 1493(S), 1495(S).

Herbarium specimens: **SPAIN**, MURCIA, Abanilla, Río Chícamo, 9 November 2004, (♂), H, A. Galán, 332, (MA!), 2. Abanilla, Río Chícamo, 9 November 2004, H, A. Galán, 332, (MA!), 1.

#### *P. hanceana* Naudin

Cultivars: so far unknown.

Accesions E-160: 37(Seed), 38(S), 317-320(S), 759(Vegetative) (~~EPSO A002~~), 760(V) (~~EPSO A004~~), 888(SV) (Palmetum 9, N 122).

Herbarium specimens: **CHINA**, CANTON AND MACAO, enero de 1837, (♀), H. C. Gaudichaud, s.n., (FI!), 1. enero de 1837, (♀), Gaudichaud, 53, (P!), 1. enero de 1837, H. Gaudichaud, 53, (P!), 3. GUANGDONG, Gaozhou (Kochow) Region, Kwong Tung, marzo de 1919, (♀), H. To Kang P'eng & C. Fuson, 2734, (US!), 1. Kwangtung (Cantón), 10 May 1932, (♂), H. Y. Lan, 21528, (P!), 1. Kwangtung (Cantón), 1 November 1921, FR, H, McClure, 8038, (P!), 1. HAINAN, Chung Nyo Shan (Ch'ang-Kiang district), 10 February 1934, (♀), H. S. Lau, 3319, (P!), 1. Hung Shek Shan (Taam-chan District), 27 April 1928, (♀), H. W. Tsang, 136, (P!), 1. Naam Shan Leg (Ngai District), 10 July 1932, FR, H, S. Lau, 230, (BM!), 1. Na-ta, 1 November 1921, (♀), McClure, 8038, (BM!), 1. Na-ta, 1 November 1921, (♀), McClure, 8038, (E!), 1. HAINAN, Na-ta, 1 November 1921, (♀), McClure, 8038, (K!), 1. HAINAN, Na-ta, 1 November 1921, (♀), McClure, 8038, (P!), 1. HAINAN, Vo Lau to Na-ta, year 1935, (♀), Linsley Gressit, 978, (BM!), 1. HAINAN, Vo Lau to Na-ta, year 1935, (♀), Linsley Gressit, 978, (E!), 1. HAINAN, Yahaw, 22 February 1918, FR, H, E. Wilson, 9848, (US!), 1. HAINAN, Yaichow, 360 m alt., 1 December 1932, FR, H, N. Chung & T. Tso, 44699, (US!), 1. HAINAN, Yaichow, 360 m alt., 1

December 1932, FR, H, N. Chung & T. Tso, 44699, (P!), 1. MACAO, Macao, enero de 1837, H, C. Gaudichaud, 53, (P!), 3. MACAO, Macao, enero de 1837, (♀), C. Gaudichaud, 53, (P!), 1. MACAO, Macao, enero de 1837, (♀), H, C. Gaudichaud, s.n., (FI-W!), 1. **FILIPINAS**, BATANES IS., Mt Iraya, 11 May 1984, H, Fernando, 403-404, (K!), 1. no precise locality, mayo o junio de 1907, FR, SE, H, E. Fenix (Bur. Sci.), 3744, (FI-B!), 3. Sabtang Island, 1 June 1907, FR, H, E. Fenix (Bur. Sci.), 3744, (FI-B!), 1. **HONG KONG**, HONG KONG ISLAND, Hong Kong, 1883-1885, (♀), H, Abbé Bon, s.n., (P!), 1. Hong Kong, year 1855, (♂), Abbé Furet, s.n., (P!), 1. ISLANDS DISTRICT, Lin Fa Shan, Fu Hoy, 29 July 1927, FR, H, Tsang, 15699, (US!), 1. SAI KUNG DISTRICT, Clearwater Bay, 31 May 1970, (♀), (♂), H, Shiu Ying Hu, 10354, (K!), 1. SAI KUNG DISTRICT, Clearwater Bay, 31 May 1970, (♀), (♂), H, Shiu Ying Hu, 10354, (US!), 1. TSUEN WAN DISTRICT, Tai Mo Shan, N.T., 150 m alt., 16 March 1995, FR, H, W. Baker & T. Utteridge, BU9, (K!), 1. **JAPON**, UNCERTAIN, Japonia, 20 November 1845, (♂), Zollinger, 3098, (P!), 1. Japonia, 20 November 1845, H, Zollinger, 3098, (P!), 1. **NUEVA CALEDONIA**, PROVINCE NORD, Nepoui, situated in New Caledonia, its geographical coordinates are 21° 21' 0" South, 165° 0' 0" East and its original name (with diacritics) is Népoui., 20 September 1981, FR, H, H. McKee, 39605, (P!), 1. **THAILAND**, CHIANG MAI PROV., Doi Inthanon, Vachiratharn Waterfall, 11 January 1994, S. Barrow & Phuma, 41223, (BKF!), 1. Doi Inthanon, Vachiratharn Waterfall, 11 January 1994, S. Barrow & Phuma, 41223, (K!), 1. KANCHANABURI PROV., 10 km along road from Thing Pha Phum to Tripagodas, 8 January 1994, S. Barrow & Wongprasert, 40032, (BKF!), 1. 10 km along road from Thing Pha Phum to Tripagodas, 8 January 1994, S. Barrow & Wongprasert, 40032, (K!), 1. TRANG PROV., Thung Kai Forest Research Station, 22 January 1994, S. Barrow & Tingnga, 29-30, (BKF!), 1. Thung Kai Forest Research Station, 22 January 1994, S. Barrow & Tingnga, 29-30, (K!), 1. **TAIWAN**, SOUTHERN TAIWAN, Formosa, südcap, febrero 1888, (♀), H, O. Warburg, 10602, (FI-B!), 1. Nan- Wan Heng-Chun, Pingtung County, 18 December 1994, (♀), (♂), Chu, 2, (K!), 1. Takao (Kaoshiung), enero de 1914, (♀), FR, Abbé Faurie, 969, (P!), 1. Takao-san, 5 June 1912, (♀), Price, 585, (K!), 1.

#### **P. loureiroi "Huerto del Cura"**

Cultivars: Huerto del Cura.

Herbarium specimens: **SPAIN, ALICANTE**, Elche, Huerto del Cura, 80 m alt., 3 September 2020, H, D. Rivera & C. Obón, s.n., (MUB!), 1.

#### **P. loureiroi var. loureiroi**

SE Asia

Cultivars: Khyber (nativa de las faldas de las montañas Hindu Kush de la provincia Khyber Pakhtunkhwa, previamente conocida como la Provincia fronteriza Norte-Oeste del noreste de Pakistán y cerca del famoso Paso Khyber que hace la conexión hacia Afganistán, fue distribuida por Rarepalmseeds).

Accesions E-160: 64(Vegetative), 64(Seed Vegetative Floral), 161(S), 182-183(S), 237(SVF) (EPSO AO01), 245(V) (~~EPSO Z07~~), 246(VF) (EPSO AO08), 295(S), 325(S), 501(V), 646(V) (EPSO AI02), 714(SVF) (EPSO D10), 978(V) (Palmetum 9, N 117), 979(V) (~~Palmetum 5, N 6~~), 980(V) (~~Palmetum 5, N 7~~), 981(V) (~~Palmetum 5, N 8~~), 982(V) (~~Palmetum 5, N 9~~), 1009(V) (Palmetum 6, N 81), 1025-1026(S), , 1188(y 1189)(S) (Palmetum 11, N 403), 1207(S).

Herbarium specimens: CAMBOYA, UNCERTAIN, Hung-Streng, years 1866 a 1868, H, Choul, 2154, (K!), 1. Hung-String, years 1866 a 1868, (♂), H, Thorel, 2154, (P!), 1. IPON, Kuang Repen, 26 May 1870, FR, H, L. Pierre, 4832, (P!), 1. Mount Kuang Repen (ad montis Kuang Repen), mayo de 1870, (♀), (♂), H, L. Pierre, 4832, (FI-B!), 1. KAMPOT, Phum Lo'ieng, Kampot, 20 February 1871, (♂), H, M. Martin, 786, (P!), 1. KOMPUNG CHAN, Kampong Speu, 11°28'N-104°32'E, 29 m alt., 17 October 2005, FR, H, C. Long & K. Cheng, 77, (P!), 1. PURSAT PROVINCE, Pursat Mountains, 20 June 1871, FR, H, M. Godefroy, 980, (P!), 1. Pursat

Mountains, 20 June 1871, (♂), H. M. Godefroy, 980, (P!), 1. CHINA, YUNNAN, Simao mts, year 1899, (♂), Henry, 12924, (CAL!), 1. Simao mts, year 1899, (♂), Henry, 12924, (FI-B!), 1. Simao mts, year 1899, (♂), Henry, 12924, (K!), 1. Yunnan, julio de 1898, H. Bons d'Anty, 155bis, (P!), 1. USA, FLORIDA, Fairchild Tropical Botanic Garden, 10901 Old Cutler Rd, Coral Gables, FL 33156, 15 May 1971, FR, H. L. Hull, M-127, (FTG!), 1. MYANMAR, BAGO REGION, Pegu (=Hanthawaddy, Bago), 6 March 1871, (♀), Kurz, 3317, (BM!), 1. Pegu (=Hanthawaddy, Bago), 6 March 1871, (♀), Kurz, 3317, (CAL!), 1. CHIN STATE, Mindat, , 16 March 1956, (♂), F. Kingdon-Ward, 21800, (BM!), 1. MANDALAY, Maymyo plateau (Pyin Oo Lwin or Pyin U Lwin), ?, (♀), Lace, 6165, (K!), 1. Maymyo plateau (Pyin Oo Lwin or Pyin U Lwin), 22 April 1913, (♀), Lace, 6165, (DD!), 1. SHAN STATE, Karin (Caren) Paddaung, year 1889, (♀), H. Da Fea, s.n., (FI-B!), 1. SHAN STATE, Shang plateau, Taunggyi (Shan Plateau), 1500 m alt., 15 September 1952, FR, H. G. Vogt, BU475, (US!), 1. THAILAND, CHIANG MAI PROV., Doi Inthanon, Vachiratharn Waterfall, , , 11 January 1994, H. S. Barrow & R. Phuma, 10, 11, 12, (BKF!), 1. Doi Inthanon, Vachiratharn Waterfall, , , 11 January 1994, H. S. Barrow & R. Phuma, 10, 11, 12, (K!), 1. Mae Sanam, 1200 m alt., 14 January 1994, FR, H. S. Barrow & R. Phuma, 23, (K!), 1. KANCHANABURI PROV., 10 km along road from Thing Pha Phum to Tripagodas, , , 8 January 1994, H. S. Barrow & Wongprasert, 7, 8, 9, (BKF!), 1. 11 km along road from Thing Pha Phum to Tripagodas, , , 8 January 1994, H. S. Barrow & Wongprasert, 7, 8, 9, (K!), 1. Khwae Noi River (Rio Kwai), Tripagodas, frontera de Birmania, 280 m alt., 9 May 1946, FR, H. A. Kostermans, 548, (P!), 1. PHUKET, Djermy a Phuket, 1 January 1912, H. H. Lecomte & A. Finet, s.n., (P!), 1. TRANG PROV., Thung Kai Forest Research Station, , , 22 January 1994, H. Barrow & Tingnga, 29, 30, (BKF!), 1. Thung Kai Forest Research Station, , , 22 January 1994, H. Barrow & Tingnga, 29, 30, (K!), 1. VIETNAM, CENTRAL DISTRICT, Annam (fôret de Daia-Kim), 27 de abri, de 1939, FR, SE, R. Müller, 1112, (P!), 2. Saigon (Thành Phố Hồ Chí Minh), jardín botánico, 2 May 1920, FR, SE, Miegé, 913, (P!), 2. DAC LAC, Hau Bon (Cheo Reo), abril de ?, (♀), H. J. Dournes, s.n., (P!), 1. HANOI, Hanoi, cultivado como ornamental, year 1908, (♂), H. J. B. ?, s.n., (P!), 1. UNCERTAIN, Ban Mé Thnot, 450 m alt., ?, (♀), H. M. Schmid, 44660, (P!), 1. KHÁNH HÒA PROVINCE, Co Hin Mountains, near Nha-Trang, 10 March 1922, FR, E. Poilane, 2792, (P!), 1. Co Hin Mountains, near Nha-Trang, 10 March 1922, H. E. Poilane, 2792, (P!), 1. Near Nha-Trang, 25 June 1923, H. E. Poilane, 5932, (P!), 1. Nha-Trang, 20 March 1911, H. C. Robinson, 1246, (P!), 1. Nha-Trang, 20 March 1911, (♀), H. C. Robinson, 1246, (P!), 1. Nha-Trang, 20 March 1911, H. C. Robinson, 1246, (P!), 1. LÂM ĐỒNG PROVINCE, Dran pro. Haut Donai in Don Duong, Lam Dong, Vietnam, its geographical coordinates are 11° 51' 0" North, 108° 35' 0" East and its original name (with diacritics) is Đran., 21 August 1940, (♀), H. E. Poilane, 30207, (P!), 1. Dran pro. Haut Donai in Don Duong, Lam Dong, Vietnam, its geographical coordinates are 11° 51' 0" North, 108° 35' 0" East and its original name (with diacritics) is Đran., 21 August 1940, H. E. Poilane, 30207, (P!), 1. Lang-Biang mountains, Dran in Don Duong, Lam Dong, Vietnam, its geographical coordinates are 11° 51' 0" North, 108° 35' 0" East and its original name (with diacritics) is Đran., 14 October 1924, FR, H. F. Eurard, 1439, (P!), 1. Lang-Biang mountains, entre Danhin y Djiring (Di Linh), 1000 m alt., 19 February 1914, FR, H. A. Chevalier, 30964, (P!), 1. Lang-Biang mountains, entre Danhin y Djiring (Di Linh), 1000 m alt., 10 June 1927, H. A. Chevalier, 30964, (P!), 2. VIETNAM, NINH THUẬN, Phan Rang, Ca Na (Phan Rang - Tháp Chàm), 500 m alt., 20 December 1923, H. E. Poilane, 9201, (P!), 1. Phan Rang, Ca Na (Phan Rang - Tháp Chàm), 31 March 1923, (♀), H. E. Poilane, 5932, (P!), 1. QUẢNG NINH, Quang Yen (collines incultes au NE), 15 April 1886, FR, B. Balansa, 4373, (P!), 1. Quang Yen (collines incultes au NE), 15 April 1886, H. B. Balansa, 4373, (P!), 1. QUANG TRI PROVINCE, 10 Km, Route 9, Quang Tri province, 10 June 1927, FR, H. E. Poilane, 13413, (P!), 2. SOUTH CENTRAL COAST, Da Nang (Tourane), agosto de 1927, H. J. & M. Clemens, 4348, (K!), 1. THANH HÓA PROVINCE, Tonkin, antes de 1886, FR, B. Balansa, 398, (P!), 1. Tonkin, ?, (♂), H. C. Canh & M. Duport, 23, (P!), 1. Tonkin, Cho Gahn experimental station, 24 July 1924, (♂), H. M. Duport, 23-24/5, (P!), 1. Tonkin, Cho Gahn



experimental station, 16 September 1924, FR, M. Duport, 23, (P!), 1. Tonkin, Couainak, 2 August 1885, H. B. Balansa, 513, (P!), 1.

## E India

Cultivars: Manipur (distribuido por Europalms y Rarepalm Seeds).

Accesions E-160: 52(Vegetative) (Palmetum 11, N 395), 147(Seed), 159(SV, Floral) (EPSO AO03), 161(S), 207(V) (Palmetum 6, N 88), 208(V) (~~EPSO 103~~), 233(V) (~~EPSO AH04~~), 234(SV) (~~EPSO T06~~), 301(S), 324(S), 353(S), 392(S), 712(S), 887(SVF) (EPSO AH02), 892(S) (Palmetum 6, N 113), 973(V) (~~Palmetum 11, N 1~~), 974(V) (~~Palmetum 11, N 2~~), 975(V) (~~Palmetum 11, N 3~~), 976(V) (~~Palmetum 11, N 4~~), 977(V) (~~Palmetum 11, N 5~~).

Herbarium specimens: BANGLADESH, DACCA, Dacca, 15 April 1868, (♀), (♂), Clarke, 6832, (FI-B!), 1. CHINA, TIBET, Below Burang (Pourang), 18 September 1850, FR, H. J. Hooker & T. Thomson, 6832, (FI-B!), 1. USA, FLORIDA, Fairchild Tropical Botanic Garden, 10901 Old Cutler Rd, Coral Gables, FL 33156, 6 November 2001, (♀), H. C. Lewis & S. Zona, 1-058, (FTG!), 1. Fairchild Tropical Botanic Garden, 10901 Old Cutler Rd, Coral Gables, FL 33156, 6 November 2001, (♀), C. Lewis & S. Zona, 1-058, (FTG!), 1. Fairchild Tropical Botanic Garden, 10901 Old Cutler Rd, Coral Gables, FL 33156, 6 November 2001, H. C. Lewis & S. Zona, 1-058, (FTG!), 1. INDIA, ANDHRA PRADESH, Ganjam Distr., Marzo 1886, Gamble, 17058, (K!), 1. ASSAM, Jaintia Hills Nurting, 1350 m alt., 16 October 1867, H. Clarke, 5334, (FI-B!), 1. Naga Hills, East of Kohima, 5 March 1935, (♀), F. Kingdon-Ward, 11131, (BM!), 1. HIMACHAL PRADESH, Una Distr., Mandi, 28 July 1977, (♀), Uniyal, 61254-61255, (BSD!), 1. KARNATAKA, Yellapore, 26 March 1905, (♀), Talbot, 4422, (CAL!), 1. Yellapore, 26 March 1905, (♀), Talbot, 4422, (K!), 1. KASHMIR, Painal, 9 September 1886, (♂), Hajra, 82338, (BSD!), 1. KERALA, Trivandrum, Ponmudi Hill, 940 m alt., 24 January 1995, (♀), S. Barrow & Bunoi, 46-47, (TBGRI!), 1. Trivandrum, Ponmudi Hill, 940 m alt., 24 January 1995, (♀), S. Barrow & Bunoi, 46-47, (K!), 1. MADHYA PRADESH, Allahabad, Durgapur, Malandighi, 25 July 1973, (♀), Mukherjee, 18789, (CAL!), 1. MAHARASHTRA, Western Ghats, Nandgaon, abril 1895, FR, SE, H. G. Woodrow, s.n., (K!), 2. Western Ghats, Nandgaon, abril 1895, (♀), (♂), G. Woodrow, s.n., (K!), 1. Western Ghats, Nandgaon, 21 February 1896, (♂), G. Woodrow, s.n., (K!), 1. Western Ghats, Nandgaon, 21 February 1896, (♀), H. G. Woodrow, s.n., (P!), 1. Western Ghats, Nandgaon, 21 February 1896, (♂), H. G. Woodrow, s.n., (P!), 1. Western Ghats, Nandgaon, 21 February 1896, (♂), H. G. Woodrow, s.n., (P!), 1. Western Ghats, Nandgaon, 1 April 1895, FR, (♂), G. Woodrow, s.n., (K!), 1. Western Ghats, Nandgaon, 1 April 1895, FR, SE, H. G. Woodrow, s.n., (US!), 1. Western Ghats, Nandgaon, 1 April 1895, FR, H. G. Woodrow, s.n., (US!), 1. MEGHALAYA, Khasia Hills (Khasi Hills), 1400 m alt., antes de 1855, (♀), H. J. Hooker & T. Thomson, 26, (P!), 1. Khasia Hills (Khasi Hills), 1400 m alt., antes de 1855, H. J. Hooker & T. Thomson, 26, (P!), 1. ORISSA, Dandakaronya, Balimela, 21 May 1958, (♀), Rao, 18478, (CAL!), 1. SIKKIM, Badawtaw, noviembre 1879, (♂), Gamble, 7340, (K!), 1. TAMIL NADU, (Coimbatore Distr.): Gudde Madappa nr. Kotadi, 27 April 1934, (♀), Nagarathai, 81797, (K!), 1. (Dindigul Distr.): Kodaikanal, rd. to Palani, 28 January 1995, S. Barrow & Kumar, 54-55, (K!), 1. (Dindigul Distr.): Kodaikanal, rd. to Palani, 28 January 1995, S. Barrow & Kumar, 54-55, (RHT!), 1. (Kuvool Distr.): Janpore, 28 July 1932, Jacob, s.n., (K!), 1. (South Arcot Distr.): North Arcot, Athanur-Yelagiri Hills., 18 March 1978, Vajravelu, 53472, (CAL!), 1. UTTAR PRADESH, Gharwal Div., 27 May 1902, (♀), Duthie, 26021, (DD!), 1. Gharwal Div., 27 May 1902, (♀), Duthie, 26021, (K!), 1. Ranipur, 29 January 1899, (♀), Kanjilal, 821, (K!), 1. Saharashdara, 9 April 1963, (♀), Mahotra, 27122, (BSD!), 1. Siwalik Hills, Rajaji National Park, c. 300 m alt., 26 January 1995, (♂), S. Barrow, 44-45, (K!), 1. Siwalik Hills, Rajaji National Park, c. 300 m alt., 26 January 1995, (♂), S. Barrow, 44-45, (DD!), 1. WEST BENGAL, Darjeeling, between Barnesbet and Singla Bazaar, 27°06'N, 88°17'E, 7 August 1992, (♀), Long et al., 1232, (E!), 1. NEPAL, KOSI ZONE, Uttarpani (27° 0' 47" N, 87° 17' 52" E, Chungwang, Dhankutā, Kosī Zone, Purwanchal, Nepal), 700 m alt., 2 September 1965, (♀), H. M. Bissa, 3328, (US!), 1. SETI ZONE, Kailali Distr., 5 miles SW of Dhangarhi, 6 December 1966, (♀), D. Nicholson,

2843-2857, (BM!), 1. SETI ZONE, Kailali Distr., 5 miles SW of Dhangarhi, 7 December 1966, (♀), H. D. Nicholson, 2857, (US!), 1.

### *P. loureiroi* var. *pedunculata* (Griff.) Govaerts

Coromandel and Tamil Nadu (sub *pedunculata*)

Cultivars: so far unknown.

Accessions E-160: 53(Vegetative), 146 (Seed, V, Floral) (EPSO AO04), 235(SVF) (AO 05), 294(S).

Herbarium specimens: **USA**, FLORIDA, Fairchild Tropical Botanic Garden, 10901 Old Cutler Rd, Coral Gables, FL 33156, 4 April 1975, FR, S. Hill, 2719, (FTG!), 1. Fairchild Tropical Botanic Garden, 10901 Old Cutler Rd, Coral Gables, FL 33156, 4 April 1975, H. S. Hill, 2719, (FTG!), 1. Fairchild Tropical Botanic Garden, 10901 Old Cutler Rd, Coral Gables, FL 33156 (from Peradeniya, Ceylon), 6 November 1979, FR, H. M. Cocos, 1394, (FTG!), 1. **INDIA**, COROMANDEL, Madras (Chennai), ?, H. ?, s.n., (K!), 1. Mysore, Hassan district, after Palya, Hassan-Saklespur road, 5 December 1970, FR, H. C. Saldanha & K. Gandhi, 1222, (US!), 1. Mysore, Hassan district, Vanagur, 1000 m alt., 23 September 1971, (♂), H. C. Saldanha & K. Gandhi, 2145, (US!), 2. Mysore, Hassan district, Vanagur, 1000 m alt., 23 September 1971, (♀), H. C. Saldanha & K. Gandhi, 2145, (US!), 1. Mysore, Hassan district, Vanagur, 1000 m alt., 23 September 1971, H. C. Saldanha & K. Gandhi, 2145, (US!), 1. **TAMIL NADU**, (Nilgiri Hills): Neilgherri Hill, (Nilagiri), junio 1849, (♀), R. Wight, 2767, (BM!), 1. (Nilgiri Hills): Neilgherri Hill, (Nilagiri), junio 1849, (♀), R. Wight, 2767, (CAL!), 1. (Nilgiri Hills): Neilgherri Hill, (Nilagiri), junio 1849, (♀), R. Wight, 2767, (FI-B!), 1. (Nilgiri Hills): Neilgherri Hill, (Nilagiri), junio 1849, FR, R. Wight, 2767, (K!), 1. (Nilgiri Hills): Neilgherri Hill, (Nilagiri), junio 1849, (♀), FR, H. R. Wight, 2767, (K!), 1. (Nilgiri Hills): Neilgherri Hill, (Nilagiri), antes de 1866, (♀), FR, R. Wight, 2767, (P!), 1. (Nilgiri Hills): Neilgherri Hill, (Nilagiri), antes de 1854, (♀), FR, (♂), H. R. Hohenacker, 1324, (P!), 1. (Nilgiri Hills): Neilgherri Hill, (Nilagiri), antes de 1854, FR, (♂), H. R. Hohenacker, 1324, (P!), 1. Nilgherri Mountains (Neilgherri Hill (Nilgiris, Tamil Nadu), ?, (♀), H. J. B. Leschenault, 212, (P!), 1.

### Jharkhand (sub. *robusta*)

Cultivars: so far unknown.

Accessions E-160: 347(Seed Vegetative) (Palmetum 9, N 116).

Herbarium specimens: **INDIA**, JHARKHAND, Parasnath Hill, Harazibagh, Giridih, Jharkhand,, ?, H. J. D. Hooker, 643(443), (K!), 1. Parasnath Hill, Harazibagh, Giridih, Jharkhand,, 10 October 1883, (♀), C. Clarke, 33791, (FI-B!), 1. Parasnath Hill, Harazibagh, Giridih, Jharkhand,, 10 February 1883, (♂), H. C. Clarke, 33791, (P!), 1. Parasnath Hill, Harazibagh, Giridih, Jharkhand,, 10 February 1883, (♂), H. C. Clarke, 33791, (FI-B!), 1. Parasnath Hill, Harazibagh, Giridih, Jharkhand,, 13 April 1884, FR, H. C. Clarke, 34767, (FI-B!), 1. Parasnath Hill, Harazibagh, Giridih, Jharkhand,, 13 April 1884, (♀), H. C. Clarke, 34767, (FI-B!), 1. Parasnath Hill, Harazibagh, Giridih, Jharkhand,, 13 April 1884, (♀), H. C. Clarke, 34767, (FI-B!), 1. Parasnath Hill, Harazibagh, Giridih, Jharkhand,, 13 April 1884, (♀), H. C. Clarke, 34767, (FI-B!), 1.

### *P. loureiroi* “Tomás Font”

Cultivars: Tomás Font.

Accessions E-160: 193(Vegetative Floral) (EPSO AC07), 194(VF) (EPSO AC03), 209(V), 255-256(V), 339 (Seed VF), 372-374(V), 650(V) (Palmetum 9, N 121), 651(V) (Palmetum 5, N 84), 652(V) (Palmetum 9, N 115), 653-654(V), 655(V) (Palmetum 9, N 120), 656(V) (Palmetum 5, N 86), 657(V), 715(V), 995(V) (~~Palmetum 7, N 9~~), 996(V) (~~Palmetum 7, N 19~~), 997(V)

(~~Palmetum 7, N 11~~), 998(V) (~~Palmetum 7, N 12~~), 999(V) (~~Palmetum 7, N 13~~), 1000(VF) (EPSO AN01), 1001(V) (Palmetum 9, N 114), 1002(VF) (EPSO AN02), 1003(VF) (~~EPSO AN03~~).

Herbarium specimens: **SPAIN, ALICANTE, Escuela Politécnica superior de Orihuela, Desamparados, 36 m alt., 2 September 2020, FR, H. D. Rivera & C. Obón, s.n. , (MUB!), 1**

#### **P. "Palmer"**

Cultivars: Palmer.

Accesions E-160: 189(Seed Vegetative Floral), 190(V), 205(VF), 206(V), 208(V), 938(SVF) (EPSO CTA11), 939(SVF) (EPSO CTA12), 940(SVF) (EPSO CTA13), 941(SVF) (EPSO CTA14), 942(SVF) (EPSO CTA15), 943(SVF) (EPSO CTA16), 944(SVF) (EPSO CTA17), 945(SVF) (EPSO CTA18), 946 (SVF) (SVF) (EPSO CTA19), 947(VF) (Palmetum 1, N1), 948(VF) (Palmetum 1, N2), 949(VF) (Palmetum 1, N3), 950(VF) (Palmetum 1, N4), 951(VF) (Palmetum 1, N5), 952(VF) (Palmetum 1, N 6), 953(VF) (Palmetum 54, N 1), 954(VF) (Palmetum 54, N 2), 955(VF) (Palmetum 54, N 3), 956(VF) (Palmetum 54, N 4), 957(VF) (Palmetum 54, N 5), 958(VF) (Palmetum 54, N 6), 1008(V) (Palmetum 6, N 124).

Herbarium specimens: **SPAIN, ALICANTE, Escuela Politécnica superior de Orihuela, Desamparados, 4 September 2020, FR, H. D. Rivera & C. Obón, s.n. , (MUB!), 1.**

#### **P. paludosa Roxb.**

Cultivars: Andaman Islands, distribuida por Rarepalmseeds en 2016.

Accesions E-160: 39(Seed), 135(S), 154(S), 160(S), 232(S), 243-244(Vegetative), 300(S), 463-4(S), 658-660(S), 687(S), 867-874(S), 893(S), 1375(S), 1515-1517(V), 1518(V) (EPSO Z03), 1519(V) (EPSO Z06), 1520(V) (EPSO Z07).

Herbarium specimens: **BANGLADESH, CHITTAGONG**, Chittagong, 5 November 1920, (♀), Cowan, 753, (E!), 1. **INDIA, ANDAMAN IS.**, Alexandra Is., 6 March 1904, Rogers, s.n., (K!), 1. Port Monat, 10 June 1893, (♀), King, s.n., (BM!), 1. Port Monat, 10 June 1893, (♀), King, s.n., (FI!), 1. Port Monat, 10 June 1893, H, King, s.n., (P!), 1. Alexandra Is., 6 March 1904, H, Rogers, s.n. , (K!), 1. Port Moriat, hill jungle, (in Ferrargunj Tehsil, South Andaman), 10 June 1893, H, King, s.n. , (US!), 1. Port Mouat (in Ferrargunj Tehsil, South Andaman), 10 June 1893, (♀), King, s.n. , (BM!), 1. Port Mouat, (in Ferrargunj Tehsil, South Andaman), 10 June 1893, (♀), King, s.n. , (FI!), 1. Port Mouat, hill jungle (in Ferrargunj Tehsil, South Andaman), 10 June 1893, H, King, s.n. , (P!), 1. South Andaman, Holdaypur, hill jungle, 4 March 1893, (♀), King, s.n. , (US!), 1. South Andaman, Holdaypur, hill jungle, 4 March 1893, (♀), King, s.n. , (P!), 1. UNCERTAIN, Keyrah Pah?, ?, H, Jacquemont, 343, (P!), 1. Keyrah Pah?, ?, FR, Jacquemont, 343, (P!), 1. s.l., <1855, H, J. Hooker & T. Thomson, s.n., (P!), 1. s.l., ?, (♀), Jacquemont, 135, (P!), 1. s.l., ?, (♀), Jacquemont, 625, (P!), 2. s.l., ?, H, Jacquemont, 625, (P!), 2. **KARNATAKA**, Kodagu (Coorg), 1 November 1858, (♂), H, Metz, 2292, (P!), 1. Kodagu (Coorg), 1 November 1858, H, Metz, 2292, (P!), 1. **NICOBAR IS.**, s.l., ? January 1893 , (♂), King , s.n. , (BM!), 1. s.l., ? January 1893 , (♂), King , s.n. , (K!), 1. **ORISSA** , Dharma, 24 April 1960, (♀), Srivastava , 69819, (DD!), 1. **WEST BENGAL**, Calcuta, <1855, (♀), H, W. Griffith, s.n., (P!), 1. Calcuta, Bordes del Ganges, 1 April 1837, FR, H, C. Gaudichaud, 6, (P!), 2. Calcuta, Bordes del Ganges, 1 April 1837, FR, C. Gaudichaud, 6, (P!), 1. Calcuta, Bordes del Ganges, 1 April 1837, (♀), C. Gaudichaud, 6, (P!), 1. Sunderbuns, ? January 1880, (♂), Gamble, 7733, (K!), 1. **INDONESIA, JAVA**, ?, ?, (♂), Zollinger, 3098, (P!), 1. **SUMATRA**, Batu Bahra (Batoe Bahra), ?, (♀), H, H. Yates, 6, (P!), 1. Batu Bahra, , ?, (♀), Yates , 1876, (BM!), 1. Batu Bahra, , ?, (♀), Yates , 1876, (P!), 1. **MALAYSIA, JOHOR**, Kuala to Kluang (2°2'1"N 103°19'10"E), 12 September 1955, H, J. Sinclair, 8620, (US!), 1. **PERAK**, Dindings, Lumut, 4 August 1936, H, Henderson , 31483, (K!), 1. **MYANMAR**, UNCERTAIN, s.l., 22 March 1906, (♀), Lace, 2965, (E!), 1. **FRENCH POLYNESIA**, ISLAS SOCIEDAD, Raiatea, N of Uturoa, 1 m., 3 January 1927, H, J. Moore, 485, (P!), 1. **THAILAND, KHONG LA UN**, N of Ranong, 25 April 1972, (♀), Chamlong & Whitmore, 3167, (K!), 1. north of Ranong, 25 April 1972, (♀), Chamlong & Whitmore, 3167,

(BKF!), 1. RANONG, 30 km NE of Ranong, 5 m., 16 July 1963, H, 2, R Merrill, 5585, (US!), 1. 30 km NE of Ranong, 5 m., 16 July 1963, (♀), 2, R Merrill, 5585, (US!), 1. 30 km NE of Ranong, 5 m., 16 July 1963, H, 2, R Merrill, 5585, (US!), 2. TRANG PROVINCE, Jaupa Distr., Kantang Forest Ecology Research Station, 22 January 1994, H, S. Barrow & T. Tingnga, 28, (BKF!), 1. Jaupa Distr., Kantang Forest Ecology Research Station, 22 January 1994, H, S. Barrow & T. Tingnga, 28, (K!), 1. Jaupa Distr., Kantang Forest Ecology Research Station, 22 January 1994, (♀), H, S. Barrow & T. Tingnga, 28, (K!), 1. **VIETNAM**, BEN TRE, Ben Tre, 5-10 m., enero de 1869, (♀), H, L. Pierre, 4835, (P!), 1. DRAN, Haut Donai, 21 August 1940, H, E. Poilane, 30207, (P!), 1. KHÁNH HÒA, Ba Ngòi port, 23 April 1954, H, M. Schmid, 5, (P!), 1. Ba-Ngòi Nha-Trang, 12°15'N-100°10'E, 23 April 1954, (♀), M. Schmid, 5am, (P!), 1. Nha-Trang, 12°15'N-100°10'E, 11 March 1911, (♀), (♂), H, C. Robinson, 1247, (P!), 1. Nha-Trang, 12°15'N-100°10'E, 23 April 1954, H, M. Schmid, 5, (P!), 1. Nha-Trang, 12°15'N-100°10'E, 11 March 1911, (♂), C. Robinson, 1247, (FI-B!), 1. Nha-Trang, 12°15'N-100°10'E, 11 March 1911, (♂), C. Robinson, 1247, (K!), 1. Nha-Trang, 12°15'N-100°10'E, 11 March 1911, (♂), H, C. Robinson, 1247, (P!), 1. LONG AN, Rach Cat, 8 March 1919, (♀), (♂), E. Poilane, 40016, (P!), 1. RED RIVER DELTA, Hanoi, < 25 January 1930, H, M. Magalon, s.n., (P!), 1. SOUTHEAST, Saigon, jardín botánico, 2 May 1920, H, H. Giep, 913, (P!), 1. THỪA THIÊN-HUẾ, Central Annam, 25 January 1930, H, M. Magalon, s.n., (P!), 1. environs de Hue et de Vinh, 25 January 1930, H, M. Magalon, s.n., (P!), 1.

#### *P. reclinata* var. *reclinata*

Cultivars: so far unknown.

Accesiones E-160: 40-41(Seed), 60(Vegetative), 137(S), 142(S), 171(V), 257(V), 258(V Floral), 282(SV) (~~EPSO F08~~), 285(SVF) (EPSO F11), 321(S), 322(SV) (~~EPSO D11~~), 348(S), 380(V), 390(S) (~~EPSO D09~~), 680(SV), 891(S) (Palmetum 53, N 28), 983(V) (~~Palmetum 53, N 4~~), 984(V) (~~Palmetum 53, N 2~~), 985(V) (~~Palmetum 52, N 4~~), 986(V) (~~Palmetum 52, N 2~~), 987(V) (~~Palmetum 52, N 3~~), 988(V) (~~Palmetum 52, N 4~~), 989(V) (~~Palmetum 52, N 5~~), 1205(S), 1469(S), 1512(S).

Herbarium specimens: **ANGOLA**, LOLA, Bibala, 14°46'S, 13°21'E, year 1951, (♂), Teixeira, 497A, (BM!), 1. **MOXICO**, Alto Zambeeze, antes de 1896, (♂), M. Kiener, s.n., (P!), 1. **AUSTRIA**, VIENA, Jardín botánico de Viena, ?, H, ?, ?, (P!), 1. **AUSTRIA**, VIENA, Jardín botánico de Viena, ?, H, ?, ?, (P!), 1. **BOTSWANA**, NGAMILAND, Okavango R., 18°27'S, 22°30'E, 30 April 1975, (♀), Biegel et al., 5042, (K!), 1. Okavango R., 18°27'S, 22°30'E, 30 April 1975, (♀), Biegel et al., 5043, (E!), 1. **BURUNDI**, GITEGA PROVINCE, Nkundarafe, Gitega-Ruyigi rd., 3°36'S, 30°06'E, 11 October 1978, (♀), (♂), Reekmans, 7146-7147, (K!), 1. **USA**, FLORIDA, Dade County, 320 Crandon Bd., 14 December 1968, H, L. Garbarini, s.n., (FTG!), 1. Dade County, Deering Estate, 14 December 1995, H, S. Zona, 707, (FTG!), 1. Fairchild Tropical Botanic Garden, 10901 Old Cutler Rd, Coral Gables, FL 33156, 20 November 2001, (♂), C. Lewis & S. Zona, 01-085, (FTG!), 1. **GABON**, ESTUAIRE PROVINCE, Owendo, 27 February 1968, FR, H, N. Halle & J. Villiers, 5587, (P!), 2. Pointe Denis, 24 February 1968, (♂), H, N. Halle & J. Villiers, 5541, (P!), 1. Pointe Denis, 24 February 1968, (♂), N. Halle & J. Villiers, 5541, (P!), 1. **UNCERTAIN**, Gabón, year 1864, (♂), Griffon, 312, (P!), 1. . Maliba River, 10 March 1969, H, J. Villiers, 39, (P!), 2. Maliba village, 24 September 1969, (♂), J. Villiers, 365, (P!), 1. Maliba village, 24 September 1969, (♂), H, J. Villiers, 365, (P!), 2. Ouang 0°29'N-9°31'E, 30 January 1986, FR, J. Reitsma, 1789, (MA!), 1. Ouang 0°29'N-9°31'E, 30 January 1986, H, J. Reitsma, 1789, (MA!), 1. **NYANGA PROVINCE**, 8 km N of Mayumba, 1-5 m alt., 8 December 1986, FR, J. de Wilde, W. Arends & J. de Bruijn, 9235, (P!), 1. . Nyanga, road Moukabala-Digoudou, 2°47'S-10°43'E, 31 January 2003, H, J. van Valkenburg, M. sosef, C. Versteegh & J. Mayombo, 2504, (P!), 4. Nyanga, road Moukabala-Digoudou, 2°47'S-10°43'E, 31 January 2003, FR, J. van Valkenburg, M. sosef, C. Versteegh & J. Mayombo, 2504, (P!), 2. Panga, 9 December 1986, H, J. de Wilde, W. Arends & J. de Bruijn, 9257, (P!), 1. **OGOOUÉ-MARITIME**, Ogooué Maritime,



Petit Loango, 2°20'S-9°35'E, 29 September 2002, H, H. Bourobou, 917, (P!), 1. Ogoúé Maritime, Petit Loango, 2°20'S-9°35'E, 29 September 2002, (♀), H. Bourobou, 916, (P!), 1. **GUINEA ECUATORIAL**, LITORAL, Punta Mbonda, ?, (♂), E. Guinea, 774, (MA!), 1. Rio Utonde, 13 August 1991, FR, H. Carvalho, 4772, (MA!), 1. Rio Utonde, 13 August 1991, H. Carvalho, 4772, (MA!), 1. **ISLAS COMORES**, MAYOTTE, Bénara, 1 May 1999, H, M. Pignal, 1331, (P!), 1. Grand Terre, Mamoudzou, 24 January 2001, FR, H, F. Berthelat, 266, (P!), 1. Iconi, Moheli, 7 December 1967, FR, Bernardi, 11792, (P!), 1. Iconi, Moheli, 7 December 1967, H, Bernardi, 11792, (P!), 1. Mayotte, year 1850, (♀), L. Boivin, 3100, (P!), 1. Mayotte, year 1850, (♀), FR, SE, L. Boivin, 3100, (K!), 1. Mjainudu, 21 February 1975, (♂), J. Floret, 1135, (P!), 1. Mjainudu, 21 February 1975, H, J. Floret, 1135, (P!), 1. Rassi Maoussi, 17 May 1999, FR, C. Mas, 173, (P!), 1. **KENYA**, MERU DISTRICT, Meru, 2 February 1955, FR, SE, P. Piovano, s.n., (FT!), 1. Meru Central, 2 May 1922, H, S. Balbo, 587, (FT!), 1. RIFT VALLEY, Mt. Nyiro (Mount Ng'iro), 1700-2000 m alt., 20 January 1977, H, G. Bono, s.n., (FT!), 1. TEITA DISTRICT, Ngerenyi, 1700 m alt., 17 September 1953, (♀), FR, H, R. Drummond & J. Hemsley, 4369, (FT!), 2. Ngerenyi, 1700 m alt., 17 September 1953, (♀), FR, H, R. Drummond & J. Hemsley, 4369, (K!), 1. **MADAGASCAR**, ATSIMO-ANDREFANA, Bassin de Mangoky, antes de 1932, (♀), H. Perrier, s.n., (P!), 1. Beroroha, Mangoky v. Isahaina, septiembre de 1933, H, H. Humbert, 11298, (P!), 3. Beroroha, Mangoky v. Isahaina, septiembre de 1933, (♀), H. Humbert, 11298, (P!), 1. Beroroha, Mangoky v. Isahaina, septiembre de 1933, FR, H. Humbert, 11298, (P!), 1. Beroroha, Mangoky v. Isahaina, septiembre de 1933, (♀), P, H. Humbert, 11298, (P!), 1. Sakondry, 30 July 1898, (♂), H, J. Grandidier, s.n., (P!), 1. UNCERTAIN, 2 km S 13 o Eana, 24 June 1992, (♀), Beentje & Andriampaniry, 4691-4692, (K!), 1. Bosu, 9 January 1968, FR, SE, B. Koehlin, s.n., (P!), 1. Nasi Bé - Loki Bé, diciembre de 1979, (♂), W. Hildebrandt, 3304, (FI-B!), 1. no precise locality, years 1847 a 1852, H, L. Boivin, 2289, (K!), 1. no precise locality, years 1847 a 1852, H, L. Boivin, 2289, (P!), 2. no precise locality, years 1847 a 1852, H, L. Boivin, 2289, (P!), 2. no precise locality, years 1847 a 1852, FR, L. Boivin, 2289, (P!), 3. no precise locality, diciembre de 1883, H, R. Baron, 2319, (K!), 3. no precise locality, diciembre de 1883, (♂), R. Baron, 2319, (K!), 1. Tsimbayaya, 27 February 1940, (♂), H, ?, 4267, (P!), 1. Tsimbayaya, 27 February 1940, FR, (♂), H, ?, 4267, (P!), 1. MENABE, Belo sur Tsiribihina, 10 September 1940, (♀), (♂), R. Decary, 15539, (P!), 1. Morondava, year 1889, (♂), Grevé, 154, (P!), 3. SAVA, Antsiranana, Vohémar, 13°35'S-49°59'E, ?, FR, H, R. Randrinavaivo, 749, (P!), 1. Antsiranana, Vohémar, 13°35'S-49°59'E, ?, FR, H, R. Randrinavaivo, 749, (FTG!), 1. VATOVAVY-FITOVINANY, Mananjary, marzo y abril de 1909, (♂), H, F. Geay, 8055, (P!), 1. BLANTYRE, Bangwe Hill, 4 km E of Limbe, 1260 m alt., 23 November 1977, (♀), Brummitt et al., 15156, (K!), 1. **MOZAMBIQUE**, MAPUTO, 5 km N of Lourenço Marques (Maputo), 29 March 1948, FR, H, R. Rodin, 4179, (FT!), 1. Estação de Biologia Marítima de Inhaca, Praia do Portinho, 3 September 1975, H, A. Reis, 691, (MA!), 1. Estação de Biologia Marítima de Inhaca, Praia do Portinho, 15 November 1975, FR, H, A. Reis, 830, (MA!), 1. Inhaca Is., 13 December 1984, (♀), Groenendijk & Dunga, 1587, (K!), 1. ZAMBEZIA, Chinde, Nhaimbo, 6 January 1970, FR, SE, H, A. Amico & R. Bavazzano, s.n., (FT!), 1. Chinde, Nhaimbo, 6 January 1970, (♀), A. Amico & R. Bavazzano, s.n., (FT!), 2. entre Conho y Mopeia, 29 December 1969, FR, SE, A. Amico & R. Bavazzano, s.n., (FT!), 1. entre Conho y Mopeia, 29 December 1969, FR, SE, H, A. Amico & R. Bavazzano, s.n., (FT!), 1. **REPÚBLICA DEMOCRÁTICA DEL CONGO**, KIVU, Kivu, S of Lake Edward, Rutshuru, 1100 m alt., 5 June 1929, H, H. Humbert, 8219, (P!), 2. SUD-UBANGUI, Oubangui, year 1892, FR, Dyboroski, s.n., (P!), 1. **RWANDA**, WESTERN PROVINCE, Kibuye, year 1978, (♀), Troupin, 15972, (K!), 1. **SOMALIA**, GEDO, Giuba Rive near Bardera, , junio de 1914, (♂), Paoli 824 , s.n. , (FI-B!), 1. Giuba Rive near Bardera, , 12 November 1913, FR, H, Paoli 824 , s.n. , (FI-B!), 1. Giuba Rive near Bardera, , 12 November 1913, (♀), Paoli 824 , s.n. , (FT!), 1. **SOUTH AFRICA**, EASTERN CAPE, Kowie River, desembocadura, 11 November 1890, FR, Mac Owan, 1636, (P!), 1. Kowie River, desembocadura, 11 November 1890, H, Mac Owan, 1636, (P!), 1. KWAZULU-NATAL, Kosi Bay, 20 January 1977, (♀), Balsinhas, 3099, (K!), 1. WESTERN

CAPE, Cafreria Britanica, 2 July 1856, H. F. de Castelnau, 285, (P!), 1. Cape, ?, (♀), Wildenow, s.n., (B!), 1. Cape Town, 2 July 1856, (♂), F. de Castelnau, s.n., (P!), 1. **TANZANIA**, IRINGA, Iringa, 4 March 1962, (♀), H. R. Polhill & S. Paulo, 1646, (P!), 1. Iringa, 4 March 1962, FR, H. R. Polhill & S. Paulo, 1646, (P!), 1. Kindu, 1900 m alt., ?, H. ?, 57, (FT!), 1. **PEMBA NORTH**, N of Lembani (Limhani) on Korogwe- Moshi rd., 800 m alt., 15 January 1976, (♀), Dransfield, 4832, (K!), 1. **RUKWA**, River Ruaha, Kindu, 1500 m alt., 29 September 1938, (♀), FR, Iringa, s.n., (FT!), 1. **TANGA**, Tanga Distr., Lwengara R., 2.5 miles E of Korogwe, 300 m alt., 16 July 1953, (♀), (♂), Drummond & Hemsley, 3342, (K!), 1. **UGANDA**, WESTERN REGION, Budongo Forest, 1200 m alt., 28 November 1938, H. Loveridge, 128, (K!), 1. **ZAIRE**, KATANGA, Pweto, julio de 1957, (♀), Devred, 3699, (K!), 1. **ZAMBIA**, NORTHWESTERN, 8 km N of Mwinilunga, 1975, year 1975, (♀), Brummit et al., 14040, (K!), 1. **ZIMBABWE**, UNCERTAIN, Rhodesia, Umvukwe Mountains, 25 April 1948, FR, H. R. Rodin, 4435, (P!), 1. **MUTARE**, Mutare, Odzani R. valley N of Penhalonga, 18°46'S, 32°41'E, 19 December 1994, (♀), Wilkin, 724, (K!), 1.

***P. spinosa* Schumacher & Thonn.**

Cultivars: so far unknown.

Accessions E-160: 143(Seed), 164(S Vegetative Floral), 168(SVF) (EPSO D12), 285(SVF) (EPSO F11), 297(S), 323(SV), 350(S), 480(S) (~~EPSO F08~~), 504(SV), 684(SVF) (EPSO F10), 726(S), 891(S), 1443(S).

Herbarium specimens: **BURKINA FASO**, BOUCLE DU MOUHOUN REGION, Samarogouan, 13 November 1978, H. B. Toutain, 2675, (P!), 1. Samarogouan-Sourou, 13 November 1978, H. B. Toutain, 2675, (P!), 1. **CAMERÚN**, CENTRE CAMEROUN, Efomzok, 8 km NE of Obala, 24 November 1964, H. J. & A. Raynal, 1205, (P!), 1. Elomzok, 8 km NE of Obala, 24 November 1964, FR, J. & A. Raynal, 1205, (P!), 2. UNCERTAIN, Dahong, abril de 1946, (♂), A. Vaillant, 1037, (P!), 1. OUEST CAMEROUN, 10 km W of Bangwa, 1750 m alt., 6 May 1964, (♂), H. W. de Wilde, 2485, (P!), 1. 14 km W of Bafang, 18 December 1981, H. B. Nkomeneck, 241, (P!), 1. 14 km W of Bafang, 18 December 1981, FR, B. Nkomeneck, 241, (P!), 1. Manongouba Mountains, 4 km WNW of Nkongamba (Nkongsamba) 4°58'N-9°56'E, 900 m alt., 12 October 1971, H. A. Leeuwenberg, 8561, (P!), 2. Manongouba Mountains, 4 km WNW of Nkongamba (Nkongsamba) 4°58'N-9°56'E, 900 m alt., 12 October 1971, FR, A. Leeuwenberg, 8561, (P!), 1. **SUD CAMEROUN**, 15 km S of Kribi, between Gr. Batanga & Ebouindia, 2°49'N-9°54'E, 2 May 1969, H. J. Boss, 4460, (P!), 1. 15 km S of Kribi, between Gr. Batanga & Ebouindia, 2°49'N-9°54'E, 2 May 1969, (♀), H. J. Boss, 4460, (P!), 1. Ipono, 5 km SSE de Campo, 25 March 1968, (♀), R. Letouzey, 9182, (P!), 1. Ipono, 5 km SSE de Campo, 25 March 1968, H. R. Letouzey, 9182, (P!), 1. Ipono, 5 km SSE de Campo, 25 March 1968, H. R. Letouzey, 9182, (P!), 1. Ipono, Ntem River, 2°20'N-9°51'E., 1 m alt., 1 December 1975, H. J. de Wilde & E. Westphal, 8692, (P!), 1. Mpalla, 12 km N of Kribi, 14 December 1968, (♀), (♂), J. Bos, 3479, (K!), 1. Mpalla, 12 km N of Kribi, 14 December 1968, H. J. Bos, 3479, (P!), 2. **FRANCIA**, PARIS, Jardín Botánico, Invernaderos procedentes de Sierra Leona, year 1830, H. M. Houillet, s.n., (P!), 1. **SAONE ET LOIRE**, Passy, Jardin de Mr. Fulchiron, ?, (♂), A. Brogniart, s.n., (P!), 1. **GAMBIA**, UNCERTAIN, Gambia, 1 March 1921, (♀), (♂), Dawe, 70, (K!), 1. **GHANA**, UNCERTAIN, Aburi Hills, 5 October 1899, (♂), Johnson, 459, (K!), 1. Costa de Oro, Achanti, 330 m alt., diciembre de 1934, FR, H. C. Vigne, 3793, (P!), 1. **GUINEA**, BOKÉ, Boké, Candéca, 18 March 1924, (♂), H. J. Chillon, s.n., (P!), 1. Boké, Candéca, 18 March 1924, FR, J. Chillon, s.n., (P!), 2. UNCERTAIN, Guinea, ?, (♀), Thonning, 101, (C!), 2. Guinea, ?, (♂), Thonning, 101, (C!), 1. Guinea, year 1814, (♀), H. Thonning, s.n., (C!), 1. **LABÉ**, Fouta Djallon, 18 September 1954, FR, R. Schnell, 7224, (P!), 1. Fouta Djallon, 18 September 1954, H. R. Schnell, 7224, (P!), 1. Fouta Djallon, 18 September 1957, (♀), H. R. Schnell, 7175, (P!), 1. Fouta Djallon, ?, H. A. Chevalier, s.n., (P!), 1. Fouta Djallon, Mali region?, septiembre de 1954, (♀), Schnell, 7224, (P!), 1. Kollangui, 2 March 1905, FR, A. Chevalier, 12823, (P!), 1. Kollangui, 2 March 1905, H. A. Chevalier, 12823, (P!), 1. Labé a Mali, 1200-1400

m alt., 18 November 1930, (♀), A. Chevalier, s.n., (P!), 1. **GUINEA-BISSAU**, BAFATÁ, Bambadinca-Ponta Inglés, 17 April 1961, FR, H. J. Alves, 1785, (MA!), 1. **BIOMBO**, Prabis, 1 December 1961, FR, H. J. Alves, 2121, (MA!), 1. **BOLAMA**, Bijagós; Orango Grande, 24 January 1961, H. F. Raimundo & J. Guerra, 904, (MA!), 1. **MAYOMBO**, Mayombo, 11 May 1919, (♀), (♂), Gossweiler, 8097, (BM!), 1. **IVORY COAST (COSTA DE MARFIL)**, BAOULÉ NORD, Kodiokoffi, Manifero, ?, (♀), H. A. Chevalier, 22314, (P!), 1. **GBEKE**, Bouaké, 13 November 1981, H. César, 1417, (P!), 1. **UNCERTAIN**, ?, 5 December 1930, FR, L. Hédin, ?, (P!), 1. **KATIOLA**, Foro-Foro forest, c. 25 km N of Bouake, 26 September 1963, H. R. Oldeman, 402, (K!), 1. Foro-Foro forest, c. 25 km N of Bouake, 26 September 1963, (♂), R. Oldeman, 402, (P!), 2. **MALI**, SIKASSO, Sanzana y Zamperso, 3 August 1969, H. N. Diarra, 86, (P!), 1. **NIGERIA**, ADAMAWA, Mumye Distr. Gangoro Forest Reserve, 1350 m alt., 9 February 1976, (♀), Chapman, 4127, (K!), 1. **KWARA**, Ayedun, Okikun (Skole, Ekitu), 16 November 1977, FR, H. Olorumfeni & Oguntayo, 388, (FHI!), 1. **REPÚBLICA CENTROAFRICANA**, **UNCERTAIN**, Ungourras Plateau?, 1 January 1906, H. A. Chevalier, 6152, (P!), 1. **REPÚBLICA DE BENIN**, **UNCERTAIN**, Dahomey, 23 April 1902, (♀), E. Poisson, 149, (P!), 1. Goowe, 23 February 1905, (♀), Le Testu, 149, (BM!), 1. **SENEGAL**, DAKAR, Cayour, junio de 1825, (♀), (♂), Lepreur, s.n., (P!), 1. Dakar, year 1847, FR, D. Boivin, 393, (P!), 1. Dakar, year 1847, H. D. Boivin, 393, (P!), 1. Dakar, enero a abril de 1906, (♂), N. Ndiage, 15789, (P!), 1. Hann, 1 May 1960, FR, H. J. & A. Raynal, 5773, (P!), 1. Senegal (N'Guiebienne, Reino de Cayor), junio de 1825, (♀), F. Leprieur, s.n., (P!), 1. **UNCERTAIN**, Mbidjane, NW of Lake Tanma, 8 February 1961, (♂), J. & A. Raynal, 7009, (P!), 1. Senegal, year 1836, (♀), M. Robers, s.n., (P!), 2. . Ndiaye cerca de Saboya, years 1933-1934, FR, H. J. Trochain, 3808, (P!), 2. Ndiaye cerca de Saboya, years 1933-1934, H. J. Trochain, 3808, (P!), 2. Ndiaye cerca de Saboya, years 1933-1934, H. J. Trochain, 5350, (P!), 2. Niayes, diciembre de 1899, (♂), A. Chevalier, 2598, (P!), 2. **OUSSOUYE**, Carabane Island, enero de 1909, FR, SE, H. A. Chevalier, 21599, (P!), 1. **TAMBACOUNDA**, Obadji to Kedougou road, 8 April 1993, (♀), Sambou et al., 1569, (K!), 1. **SIERRA LEONA**, **UNCERTAIN**, No. 2 River Peninsula, 30 Sept. 1965 , 30 September 1965, (♂), Morton & Jarr , 2298-2395, (SL), 1. No. 2 River Peninsula, 30 Sept. 1965 , 30 September 1965, (♂), Morton & Jarr , 2298-2395, (K!), 1. No. 2 River Peninsula, 30 Sept. 1965 , 30 September 1965, (♂), Morton & Jarr , 2298-2395, (GC), 1. No. 2 River Peninsula, 30 Sept. 1965 , 30 September 1965, (♂), Morton & Jarr , 2298-2395, (WAG), 1. No. 2 River Peninsula, 30 Sept. 1965 , 30 September 1965, (♂), Morton & Jarr , 2298-2395, (FHI), 1. No. 2 River Peninsula, 30 Sept. 1965 , 30 September 1965, (♂), Morton & Jarr , 2298-2395, (IFAN), 1.

#### **P. roebelenii** O'Brien

##### Cultivars: Reasonerii.

Accessions E-160: 141(Seed), 145(S), 152(S), 162(S), 264(Vegetative Floral) (Palmetum 9, N 110), 292(S), 298(S), 535(S Vegetative Floral), 664(V), 894(S), 928(SVF) (EPSO CTA01), 929(SVF) (EPSO CTA02), 930(SVF) (EPSO CTA03), 931(SVF) (EPSO CTA04), 932(SVF) (EPSO CTA05), 933(SVF) (EPSO CTA06), 934(SVF) (EPSO CTA07), 935(SVF) (EPSO CTA08), 936(SVF) (EPSO CTA09), 937(SVF) (EPSO CTA10), 967(V) (Palmetum 6, N 1), 968(V) (Palmetum 6, N 2), 969(V) (Palmetum 6, N 3), 970(V) (Palmetum 6, N 4), 971(V) (Palmetum 6, N 5), 972(V) (Palmetum 6, N 6), 1208(S), 1253(S), 1274(S) (Palmetum 6, N 87), 1372(S), 1580(S).

Herbarium specimens: **CHINA**, YUNNAN, banks of Mekong R. Chiu-lung Chiang, 23 February 1922, P. Rock , 2531, (E!), 1. **COSTA RICA**, PUNTARENAS, Las Vegas de Limoncito 8°50'N-83°5'W, 800 m alt., 8 October 2002, H. A. Frances, 205, (FTG!), 1. **USA**, FLORIDA, Fairchild Tropical Botanic Garden, 10901 Old Cutler Rd, Coral Gables, FL 33156, 10 m alt., 10 May 1962, FR, H. R. Read, 749, (FTG!), 1. Fairchild Tropical Botanic Garden, 10901 Old Cutler Rd, Coral Gables, FL 33156, 10 m alt., 10 June 1963, (♀), H. R. Read, 749, (FTG!), 1. Fairchild Tropical Botanic Garden, 10901 Old Cutler Rd, Coral Gables, FL 33156, 10

m alt., 1 June 1962, (♂), R. Read, 748, (FTG!), 1. Fairchild Tropical Botanic Garden, 10901 Old Cutler Rd, Coral Gables, FL 33156, 10 m alt., 16 May 1989, (♂), H. W. Houghton, 1093, (FTG!), 1. **LAOS**, LUANG NAMTHA, Mekong, 2 October 1889, H. O'Brien, s.n., (K!), 1. River Mekong, H. A. Magalon, 28, (P!), 1. River Mekong (Kemarath?), years 1866 a 1868, (♂), Thorel, s.n., (P!), 1. **VIETNAM**, UNCERTAIN, no precise locality, year 1890, (♀), H. B. Balansa, 4471, (FI-B!), 1. no precise locality, year 1890, FR, H. B. Balansa, 4471, (P!), 1. no precise locality, year 1890, (♀), H. B. Balansa, 4471, (K!), 1. no precise locality, year 1890, H. B. Balansa, 4877, (FI-B!), 1. no precise locality, year 1890, H. B. Balansa, 4877, (P!), 4. no precise locality, year 1890, H. B. Balansa, 4877, (K!), 1.

#### *P. rupicola* var. *rupicola*

Cultivars: Variegada.

Accesions E-160: 55(Vegetative Floral) (EPSO W04), 61(V), 139(V), 149(Seed VF) (EPSO W02), 158(S), 203(VF) (EPSO Z02), 204(V) (~~EPSO AC02~~), 213(V) (EPSO W06), 214(VF) (EPSO W05), 259(VF) (EPSO W07), 260(V) (EPSO AI04), 291(S) (Palmetum 9, N 111), 292(S), 296(S), 326(SV) (~~EPSO K13~~), 349(S), 378-379(V), 391(S), 474(VF) (EPSO W04), 713(S), 886(S) (Palmetum 7, N 82), 889(S), 1004(V) (~~EPSO AL04~~), 1185(S), 1252(S), 1374(S), 1419(S), 1471(SV) (Palmetum 16, N 164), 1521-1522(V).

Herbarium specimens: **BELGICA**, GANTE, Gent Kas Hortus, 19 December 1952, H. Jih-Ching Liao, 23843, (L!), 1. **BHUTAN**, SAMTSE DISTRICT, Khagra valley, near Gokti (26°49'N - 89°12'E), 2 March 1982, H. Grierson & Long, 3414, (K!), 1. **ZHEMGANG DISTRICT**, Lower Mangde Valley, Tama, 27°10' N-90°39'E (Trong Gewog), 26 June 1979, (♂), Grierson & Long, 1354, (E!), 1. **CUBA**, SANTA CLARA, Soledad, Cienfuegos, , 17 April 1930, (♀), H. J. Jack, 7923, (US!), 1. **USA**, FLORIDA, Fairchild Tropical Botanic Garden, 10901 Old Cutler Rd, Coral Gables, FL 33156, 19 December 1969, (♀), H. D. Hull, H88, (FTG!), 1. **INDIA**, ASSAM, Shillong, Kimin to Khunipahad, 25 September 1959, (♀), Panigrahi, 19485, (CAL!), 1. **SIKKIM**, 24 June 1876, H. King, s.n., (CAL!), 1. 24 June 1876, H. King, s.n., (BM!), 1. 19 January 1877, H. Davis & Gamble, 2387a, (CAL!), 1. 21 January 1877, H. Davis & Gamble, 2387b, (K!), 1. **WEST BENGAL**, Sivoka, Teesta valley, 23 February 1867, (♀), Herb. Sikkimensis Anderson, s.n., (CAL!), 1. Sivoka, Teesta valley, 23 February 1867, (♀), Herb. Sikkimensis Anderson, s.n., (K!), 1. **TAIWAN**, SOUTHERN TAIWAN, Heng Chun Branch (Hengchun), 16 May 1966, (♀), H. Jih-Ching Liao, 10544, (L!), 2 (cultivado).

#### *P. rupicola* “Medipalm”

Cultivars: Medipalm.

Accesions E-160: 47(Seed, Vegetative, Floral).

Herbarium specimens: **SPAIN**, **ALMERIA**, Medipalm, Pozo del Esparto, 2 September 2020, FR, H. D. Rivera & C. Obón, s.n., (MUB!), 1

#### *P. sylvestris* “Edulis”

Cultivars: Abe Dandan, Akhrot, Ali puri chohara, Apdandon, Assel (Aseel), Bagun = Koroch, Barani, Began, Begum Jungi, Begun, Be-Rehmi, Chapshoq, Chowhara (Chohara) (puede ser una variedad pero también una forma de deshidratar hasta un grado extremo los dátiles, que se aplica a un buen número de variedades), Desi, Dhaidi (Dehdi) wali, Dhakki, Dhandariand, Fasly (Fasli, Faslee), Gajar, Goknah, Gorakh, Gulistan, Gurbago, Gush, Haleni, Hardasht, Hawwa wali (Hawwawiri), Hussaini, Jaman, Jan-sohar, Kalara, Karbali, Karblain, Kasho Wali (Kashoowari), Kharoch, Khupra (Kuproo), Klair, Koherba, Laloo, Lasora, Lolo, Makran, Mobai, Muzawati (Mozafat, Mozafati, Mozaty, Mozawati), Naquel Khuh, Nisri, Ood kafir, Oshkench, Otakanr, Otaquin, Peli Kundar, Rabai, Rachna, Roghni, Rotab Mazafati, Rukkan, Sabzo, Sajho Wali, Sangol, Seib, Shado, Shakri, Shamram, Sher Shahi, Surkh, Wahn wali, Washkonk, Zardo, Zayaki,



Zerin. Dhakki, Aseel y Begum Jungi son las variedades más importantes en Pakistan, seguidas del resto arriba listado y de algunas variedades introducidas desde Iraq y Arabia (Naqvi 2015).

Accesions E-160: (acantofilos gruesos cortos): 196(Seed Vegetative Floral) (EPSO AQ07), 266(SVF) (EPSO AQ05), 394(SVF) (EPSO AS02), 451(S), 454(S), 682(SV) (EPSO AS06), 755-756(S), 1318(S), 1544(S).

Herbarium specimens: **INDIA**, UNCERTAIN, India, ?, H, V. Jacquemont, 135, (P!), 1. PUNJAB, Tirtun Beas Valley, Kulu, 110 m alt., 22 June 1916, (♀), H, R. Cooper, 5048, (P!), 1. WEST BENGAL, Calcuta, Jardín Botánico, ?, (♀), H, C. Gaudichaud, s.n., (P!), 1. Calcuta, Jardín Botánico, ?, H, C. Gaudichaud, s.n., (P!), 3. Calcuta, Jardín Botánico, ?, (♀), C. Gaudichaud, s.n., (P!), 1. Calcuta, Jardín Botánico, ?, FR, C. Gaudichaud, s.n., (P!), 2. Calcuta, Jardín Botánico, year 1839, FR, SE, C. Gaudichaud, s.n., (FI-B!), 2. Calcuta, Jardín Botánico, ?, FR, SE, H, ?, s.n., (P!), 1. **PAKISTAN**, BALOCHISTAN, N Baluchistan, ?, H, ?, s.n., (CAL!), 1. **FRENCH POLYNESIA**, LEEWARD ISLANDS, Raiatea, N of Uturoa, 3 January 1927, H, J. Moore, 485, (P!), 2.

### *P. sylvestris* var. *sylvestris*

Cultivars: Katou Indel, Robusta, Round Seeds. En el restaurante McGarbage de Orlando (Florida) existe un individuo con múltiples ramificaciones.

Accesions E-160: **SYLVESTRIS** (acantofilos gruesos cortos): 43-44(Seed), 45 (Palmetum 9, N 109), 56(Vegetative Floral) (~~EPSO A108~~), 62(VF) (EPSO F06), 144(SVF) (EPSO Z04), 148(SVF) (EPSO AR02), 156(SVF) (EPSO AR01), 157(SVF) (EPSO AR08), 261(SVF) (EPSO AR07), 284(SVF) (EPSO AR05), 293(SVF) (EPSO AR06), 336(S), 340(SVF) (EPSO AS04), 341(SVF) (EPSO AS03), 342(V), 352(SVF) (EPSO AS07), 386(SVF) (EPSO AH04), 387(SVF) (EPSO Z05), 388 (Palmetum 7, N 85), 393(SV) (Palmetum 9, N 119), 500(V), 647(V) (Palmetum 11, N 389), 648(V) (Palmetum 9, N 127), 649(V), 703(V) (~~EPSO Z03~~), 762(V) (Palmetum 6, N 83), 763(V) (Palmetum 9, N 118), 1206(S). **ROBUSTA** (acantofilos delgados): 57(Seed Vegetative Floral) (EPSO T04), 151(SVF) (EPSO AR03), 215(SVF) (EPSO AR04), 262(SVF) (EPSO AS08), 304(S), 329(SVF) (EPSO AS05), 1209(S).

Herbarium specimens: **BANGLADESH**, CHITTAGONG, Chittagong (Chattogram), ?, (♀), (♂), J. Hooker & T. Thomson, 898, (P!), 1. Chittagong (Chattogram), 10 January 1851, (♀), (♂), J. Hooker, 526, (K!), 1. Chittagong (Chattogram), 10 January 1851, (♂), J. Hooker, s.n., (K!), 1. **USA**, FLORIDA, Fairchild Tropical Botanic Garden, 10901 Old Cutler Rd, Coral Gables, FL 33156, 1 January 1970, (♀), H, Hull, H20, (FTG!), 1. **INDIA**, BIHAR, Behar, ?, (♀), H, J. Hooker & T. Thomson, 18, (P!), 1. Chota Nagpur, febrero 1876, (♀), (♂), Wood, s.n., (DD!), 1. Chota Nagpur, febrero 1876, (♀), (♂), Wood, s.n., (CAL!), 1. PUNJAB, between Meerut and Delhi, , 19 March 1962, (♂), Nair, 20818, (BSD!), 1. Mount Tilla, Salt Range, 20 May 1890, (♂), McDonald, s.n., (K!), 1. Mount Tilla, Salt Range, 20 May 1890, FR, SE, McDonald, s.n., (K!), 1. RAJHASTHAN, Jhalawar, Batta rd., , 28 May 1965, (♀), Wadhwa, 9519, (CAL!), 1. Udaipur, Barman Hill., 4 January 1986, (♀), Swami, 779, (BSD!), 1. TAMIL NADU, Jaupore Distr., Negapatam, , 25 July 1932, (♀), Jacob, s.n., (K!), 1. Trichy Distr., Srirangam Is., , 1 April 1976, (♀), Matthew, 1843, (RHT!), 1. Trichy Fort Station, , 30 January 1995, Matthew & Barrow, 58-59, (K!), 1. UTTAR PRADESH, Moradabad, , Marzo 1844, (♂), Thomson, s.n., (K!), 1. WEST BENGAL, Bords du Gange, ?, (♀), C. Gaudichaud, s.n., (P!), 1. Calcuta, ?, H, ?, s.n., (P!), 1. Calcuta, Jardín Botánico, ?, H, ?, s.n., (P!), 1. Calcuta, Jardín Botánico, ?, FR, H, ?, s.n., (P!), 1. Dholutapur, Comilla, , 5 February 1943, (♂), Sinclair, 2840, (E!), 1. **NEPAL**, SINDHULI DISTRICT, Kamali valley (Kamala River valley), btn. Manona and Badalkot, , 25 April 1952, (♀), Polunin et al., 3974, (BM!), 1.

### *P. theophrasti* “Datça” & “Gölköy”

Cultivars: Datça, Gölköy.

Accessions E-160: DATÇA: 163(Seed Vegetative) (EPSO L10), 165(SV) (EPSO L04), 286 (SV) (EPSO K05), 875(SV), 876(SV) (Palmetum 43, N 183), 1408(S), 1492(S). GÖLKÖY: 58(Seed Vegetative Floral) (EPSO L06), 166(SV) (EPSO L05), 167(SV) (EPSO L11), 287(SV) (EPSO L07), 355(S), 498(V), 1409(S).

Herbarium specimens: **TURQUÍA**, FINIKE, Kumluca-Karaçz Bay, 24 April 1994, (♀), S. Barrow & M. Boydak, 41, 42, (K!), 1. UNCERTAIN, Hurmalibfik village, 22 April 1994, (♀), S. Barrow & M. Boydak, 37, 37A, (K!), 1. Hurmalibfik village, 22 April 1994, (♂), S. Barrow & M. Boydak, 38, (K!), 1. MUĞLA, Datça peninsula, ?, (♀), M. Boydak, s.n., (K!), 1. Muğla, 10 July 1982, FR, H. M. Boydak & M. Yaka, s.n., (E!), 1. Muğla, 10 July 1982, H. M. Boydak & M. Yaka, s.n., (E!), 1. Muğla, Aznaklihisk, Datça, 8 October 1982, FR, M. Boydak & M. Yaka, s.n., (E!), 1.

### **P. theophrasti** var. **theophrasti**

Cultivars: Preveli, Vai.

Accessions E-160: 48(Seed), 59(S Vegetative Floral) (EPSO L08), 63(V), 138(SV) (EPSO J05), 153(SV) (~~EPSO L13~~), 175(SV), 239(S), 322, 354(SV) (EPSO L12), 499(V) (~~EPSO F07~~), 674(VF) (EPSO L09), 890(SV) (Palmetum 43, N 169), 900(V), 990(V) (~~Palmetum 19, N 1~~), 991(V) (Palmetum 43, N 171), 992(V) (~~Palmetum 19, N 3~~), 993(V) (Palmetum 43, N 182), 994(V) (Palmetum 43, N 184), 1173(SV) (Palmetum 54, N 187), 1175(S), 1177(S), 1181(SV) (Palmetum 54, N 188), 1184(S), 1245(SV) (Palmetum 13, N 433), 1246(S), 1379-1385(S), 1391-1393(S), 1475(V).

Herbarium specimens: **GRECIA**, CRETE, Colina frente a Phaistos, 5 January 1987, H. J. Shay, 1664, (B!), 1. Finikodasos, E of Vai, 29 September 1975, FR, H. H. Merxmüller & D. Podlech, 30920, (B!), 1. Kissamos, Hrisoskalitissa, , 27 April 1989, (♀), P. Turland, 93, (BM!), 1. NW Toplou Monastery, , , 60 m alt., 30 March 1990, FR, Turland et al., 115, (BM!), 1. Preveli, 27 June 1967, H. Barclay, 272, (K!), 1. Sitia Prov., nr. Vai, , 6 m alt., 2 October 1966, FR, H. Greuter, 7650, (PAL: hb Greuter!), 1. Sitia Prov., nr. Vai, , 7 m alt., 2 October 1966, FR, H. Greuter, 7650, (B!), 1. Sitia Prov., nr. Vai, , 7 m alt., 2 October 1966, FR, (♂), H. Greuter, 7650, (B!), 2. Sitia Prov., nr. Vai, , 8 m alt., 2 October 1966, FR, H. Greuter, 7650, (E!), 1. Sitia Prov., nr. Vai, , 9 m alt., 2 October 1966, FR, H. Greuter, 7650, (G!), 1. Sitia Prov., nr. Vai, , 10 m alt., 2 October 1966, FR, H. Greuter, 7650, (GB!), 1. Sitia Prov., nr. Vai, , 11 m alt., 2 October 1966, FR, H. Greuter, 7650, (ATH!), 1. Sitia Prov., nr. Vai, , 12 m alt., 2 October 1966, FR, H. Greuter, 7650, (UPA hb Phitos), 1. Sitia Prov., nr. Vai, , 13 m alt., 2 October 1966, FR, H. Greuter, 7650, (OAC hb Zaffran), 1. Sitia Prov., nr. Vai, , 14 m alt., 2 October 1966, H. Greuter, 7650, (K!), 1. Sitia Prov., nr. Vai, , 14 m alt., 2 October 1966, FR, (♂), H. Greuter, 7650, (K!), 1. Sitia Prov., nr. Vai, , 15 m alt., 2 October 1966, FR, H. Greuter, 7650, (LD), 1. Sitia Prov., nr. Vai, , 16 m alt., 2 October 1966, FR, H. Greuter, 7650, (M), 1. Sitia Prov., nr. Vai, , 17 m alt., 2 October 1966, FR, H. Greuter, 7650, (W), 1. Vai, 5 m alt., 9 April 1974, FR, Canon & Canon, 4303, (BM!), 1. Vai, 3 April 1970, (♀), Synge, 19, (K!), 1. Vai, 9 April 1974, (♀), Canon & Canon, 4303, (BM!), 1.

### **P. zeylanica** Trimen

Cultivars: so far unknown.

Accessions E-160: 54(Vegetative), 65(V Floral) (EPSO AH 06), 184-185(V), 202(V) (EPSO AH 05), 236(Seed VF) (EPSO AI 06), 299(SVF) (EPSO AI 07), 1005(V) (~~Palmetum 7, N 14~~), 1006(V) (~~Palmetum 7, N 15~~), 1007(V) (~~Palmetum 7, N 16~~), 1023-1024(S), 1528(S).

Herbarium specimens: **INDONESIA**, JAVA, Java, ?, (♂), Zollinger, 3098, (P!), 1. **SRI LANKA**, (GALLE DISTR.), Kanneliya Forest Reserve, Hiniduma, 6 March 1992, (♀), De Zoysa, 11, (PDA!), 1. (KALUTARA DISTR.), Habungala, Bentota, 10 March 1972, (♀), Amaratunga, 2389, (PDA!), 1. (KURUNEGALA DISTR.), Wariyapola, 27 March 1970, (♀), Amaratunga, 2045, (PDA!), 1. (PUTTALAM DISTR.), Chilaw to Puttalam road, 3 February 1995, FR, H. S. Barrow & Weerasooriya, 66, (K!), 1. Chilaw to Puttalam road, 3 February 1995, (♀), S. Barrow

& Weerasooriya, 67, (K!), 1. Chilaw to Puttalam road, 3 February 1995, (♀), S. Barrow & Weerasooriya, 67, (PDA!), 1. Chilaw to Puttalam road, 3 February 1995, (♂), S. Barrow & Weerasooriya, 68, (K!), 1. Chilaw to Puttalam road, 3 February 1995, (♂), S. Barrow & Weerasooriya, 68, (PDA!), 1. Miriswatte, Negombo- Maradagahamula road, 1 October 1992, (♀), (♂), De Zoysa, 72, (PDA!), 1. UNCERTAIN, ?, year 1862, H. G. Twaites, 3172, (K!), 2. ?, year 1868, (♂), G. Twaites, 3172, (P!), 1. ?, year 1854, FR, SE, H. G. Twaites, 3172, (P!), 1. ?, FR, SE, (♂), H. G. Twaites?, 3172, (BM!), 1. NORTHERN PROVINCE, Wilpattu National Park, Kollankanatta, 27 April 1969, FR, H. D. Mueller-Dombois, N. Wirawan, R. Cooray, N. Balakishnan, 69042723, (US!), 2. WESTERN PROVINCE, Diyakadwa - Makagama, 11 December 1969, (♀), Jayasinghe & Read, 2343, (US!), 1. Diyakadwa - Makagama, 11 December 1969, FR, Jayasinghe & Read, 2343, (US!), 1. Diyakadwa - Makagama, 11 December 1969, H. Jayasinghe & Read, 2343, (US!), 2.

## Hybrids

### *P. canariensis* x *P. reclinata*

Cultivars: so far unknown.

Accesions E-160: 303(Seed), 458(S Vegetative Floral) (EPSO C08), 484-485(S), 490(SV) (~~EPSO N05~~), 536(SV) (Palmetum 25, N 140), 690(SVF) (EPSO D08), 1104 (SV) (Palmetum 53, N 335), 1105(S), 1187(S), 1314(S), 1468(S), 1525(S), 1565(S).

Herbarium specimens: so far unknown.

### *P. dactylifera* x *P. canariensis*

Cultivars: 1. Oct. 1866 Naudin. 2. 1887. Orotava. H. Wildpret. 3. 1888. Cannes. Duchartre. 4. 1888. Ed. André.

Accesions E-160: **HIBRIDOS CON EL GRUPO ORIENTAL**: 4(Seed Vegetative Floral) (EPSO AM08), **HIBRIDOS CON EL GRUPO OCCIDENTAL**: 307 (Seed Vegetative Floral) (EPSO H12), 332(Seed), 522(S Vegetative Floral) (EPSO G05), 560(SV) (Palmetum 31, N 230), 574(SV) (Palmetum 40, N 234), 590(SV) (Palmetum 31, N 235), 630(SVF) (EPSO K07), 801(SV) (Palmetum 12, N 108), 803(SV) (Palmetum 36, N 406), 821(SV) (Palmetum 39, N 214), 826(S), 864(SV) (Palmetum 55, N 358), 1044(S), 1118-1119 (S), 1121(S), 1228 (Palmetum 20, N 311), 1313(S), 1428(S), 1438(S), 1441(S), 1494(S), 1499-1500(S), 1501-1505(S), 1507(S), 1526(S).

Herbarium specimens: **SPAIN**, ISLAS CANARIAS, La Orotava, year 1887, FR, SE, ?, s.n., (FI-B!), 1.

### *P. dactylifera* x *P. reclinata*

Cultivars: so far unknown.

Accesions E-160: 1323(S).

Herbarium specimens: so far unknown.

### *P. dactylifera* x *P. sylvestris*

Cultivars: so far unknown.

Accesions E-160: 42(Seed Vegetative Floral) (EPSO AS01), 328(SV) (~~EPSO Z06~~).

Herbarium specimens: **INDIA**, UTTAR PRADESH, Saharanpur, giardino botanico, year 1886, FR, SE, ?, s.n., (FI-B!), 1.
